# Supplementary material for: An efficient synthesis of quinolines via copper-catalyzed C–N cleavage
Source: Royal Society of Chemistry journal article supplement (doi:10.1039/c5ob00075k), 2015-01-01

## Support Information

### An Efficient Synthesis of Quinolines Via Copper-catalyzed C-N Cleavage

Long-Yi Xi, Ruo-Yi Zhang, Lei Zhang, Shan-Yong Chen,\* and Xiao-Qi Yu\*

<sup>1</sup>H NMR of compound **3a**

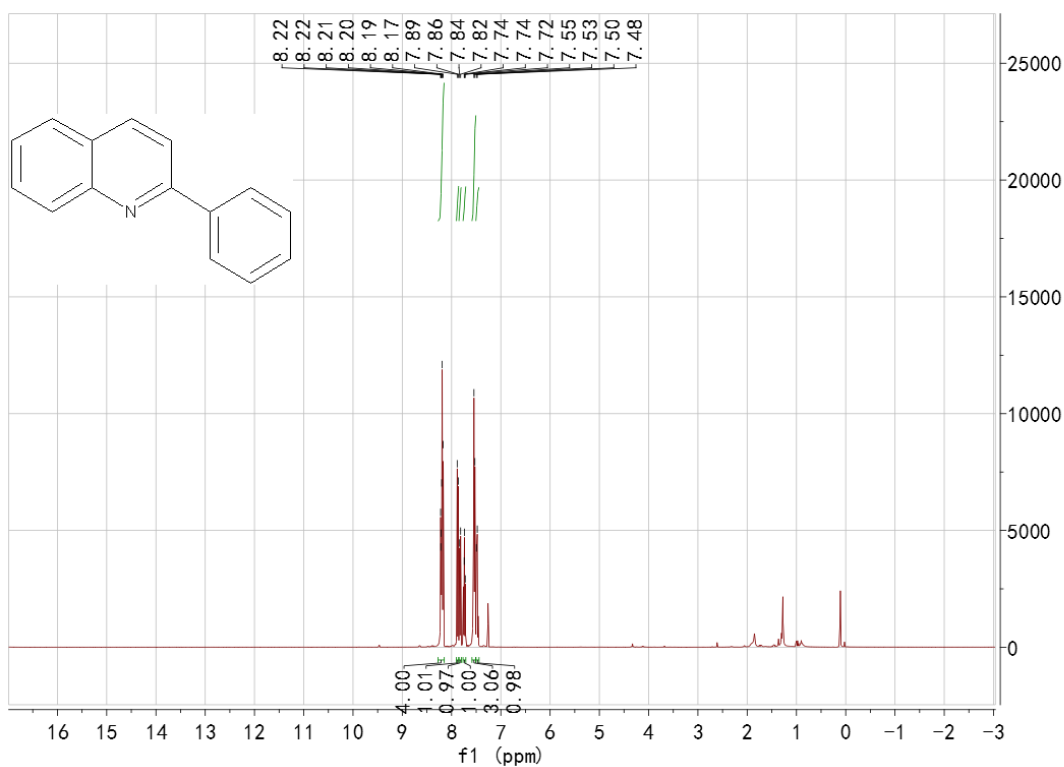

<sup>13</sup>C NMR of compound **3a**

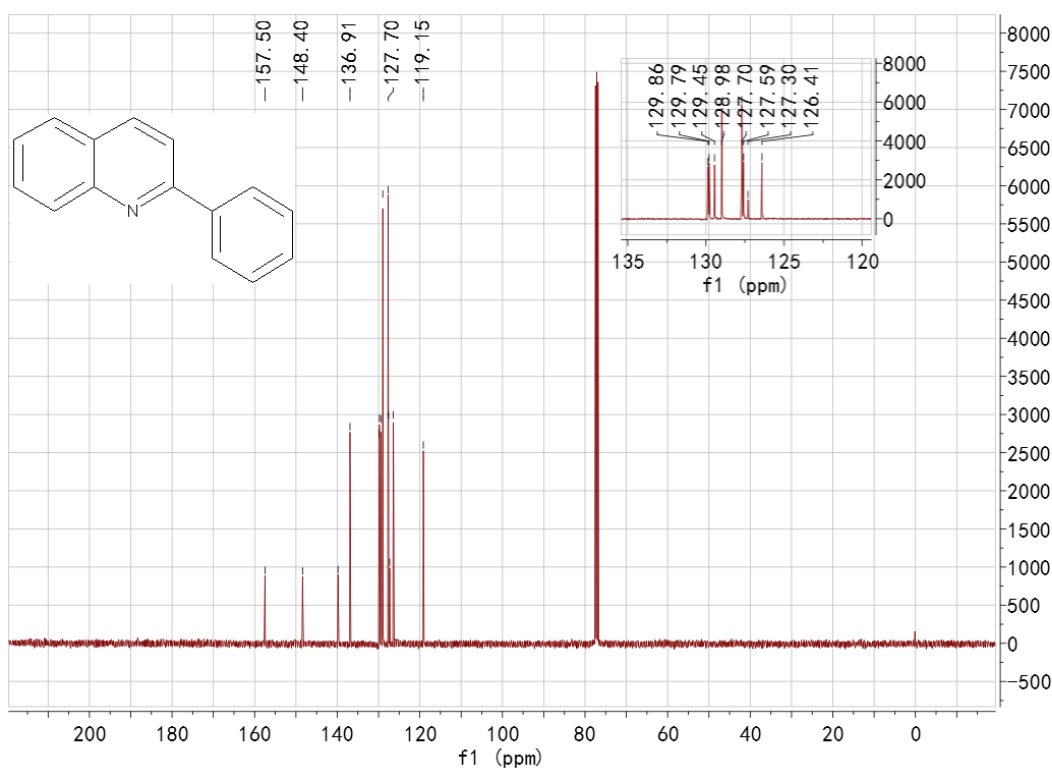

<sup>1</sup>H NMR of compound **3b**

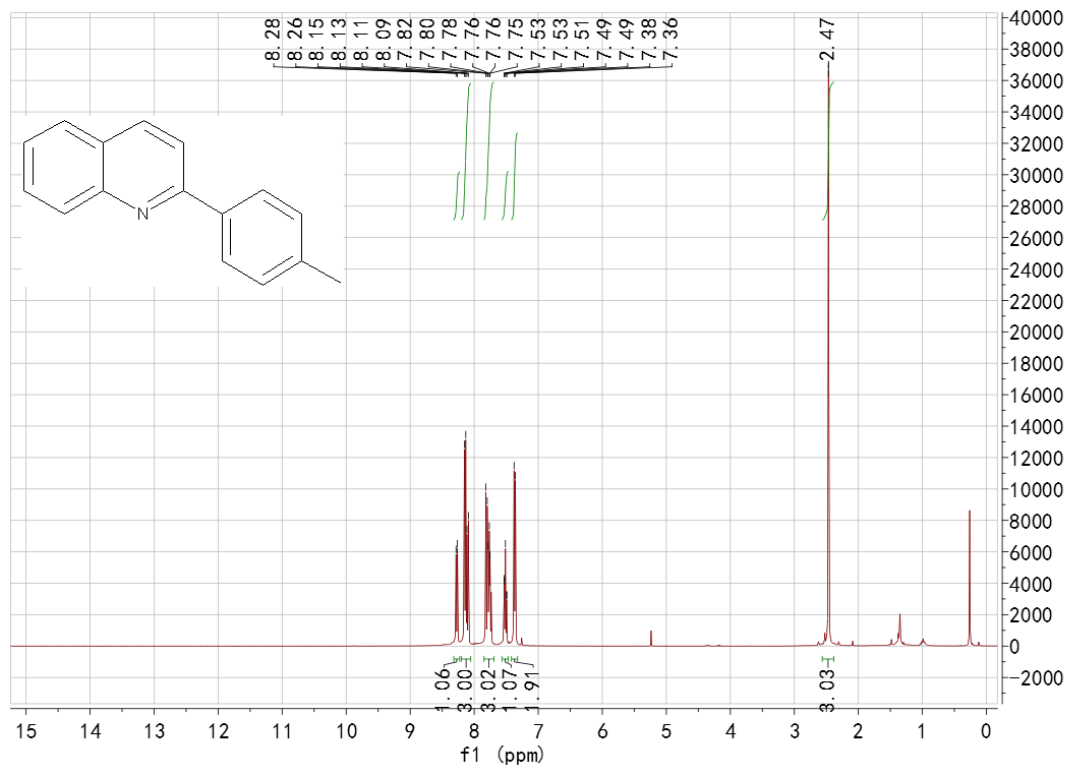

<sup>13</sup>C NMR of compound **3b**

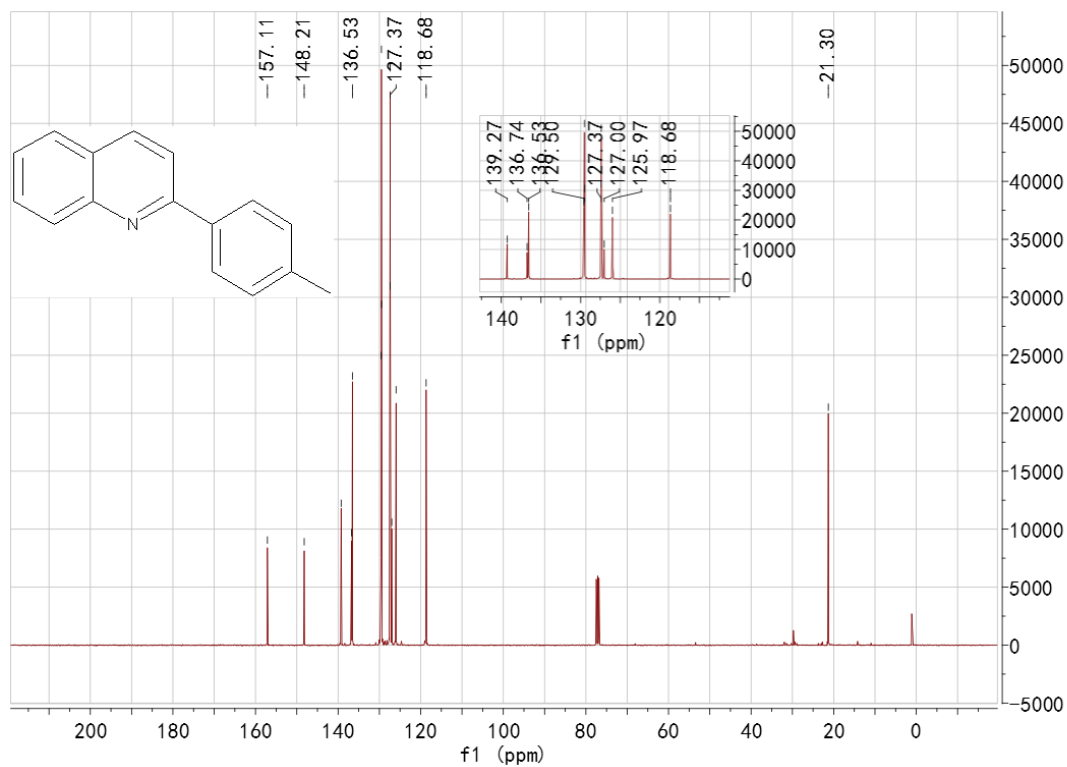

<sup>1</sup>H NMR of compound **3c**

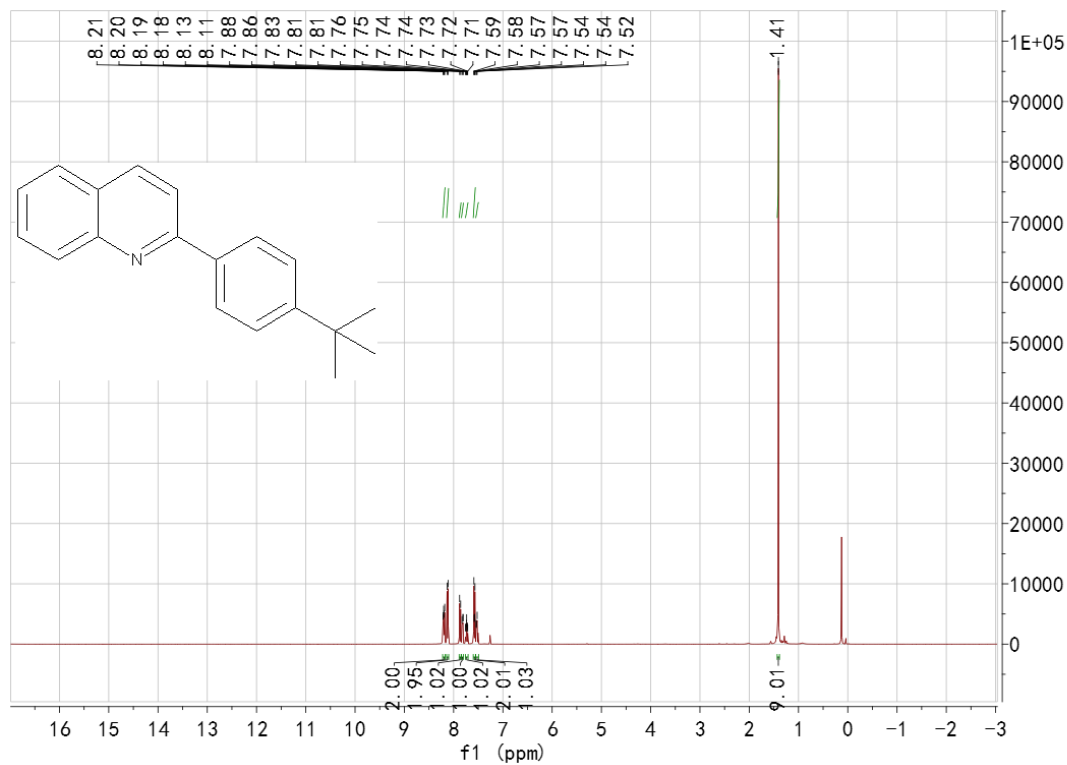

<sup>13</sup>C NMR of compound **3c**

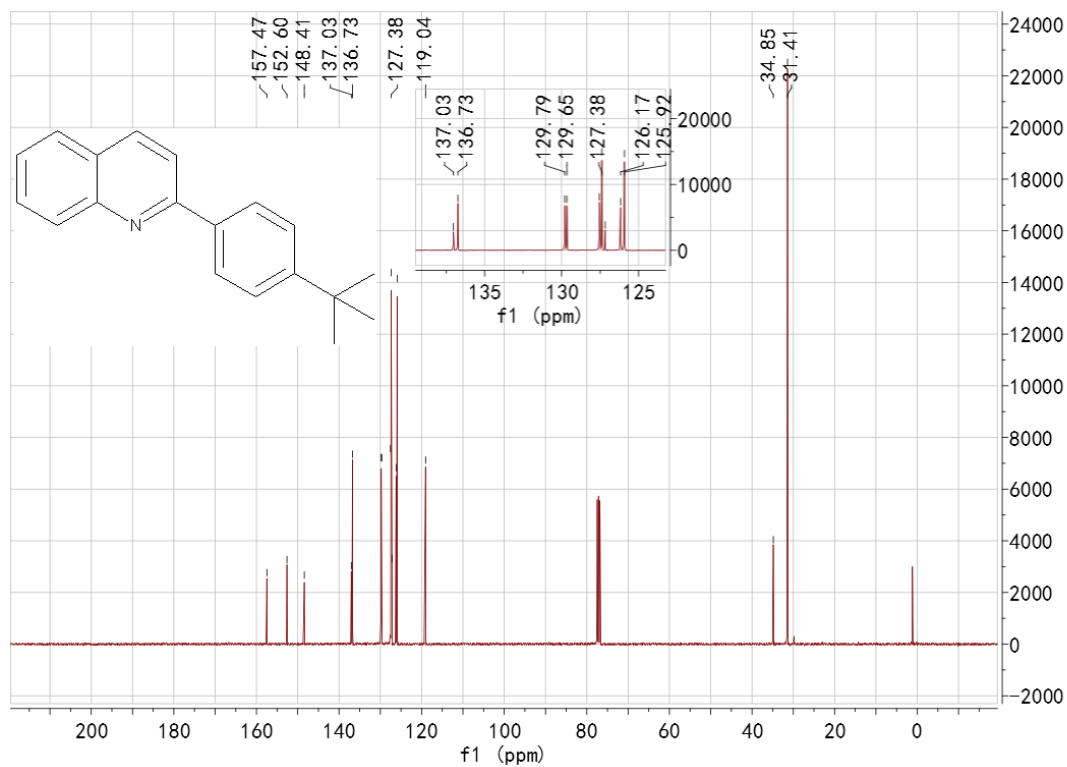

<sup>1</sup>H NMR of compound **3d**

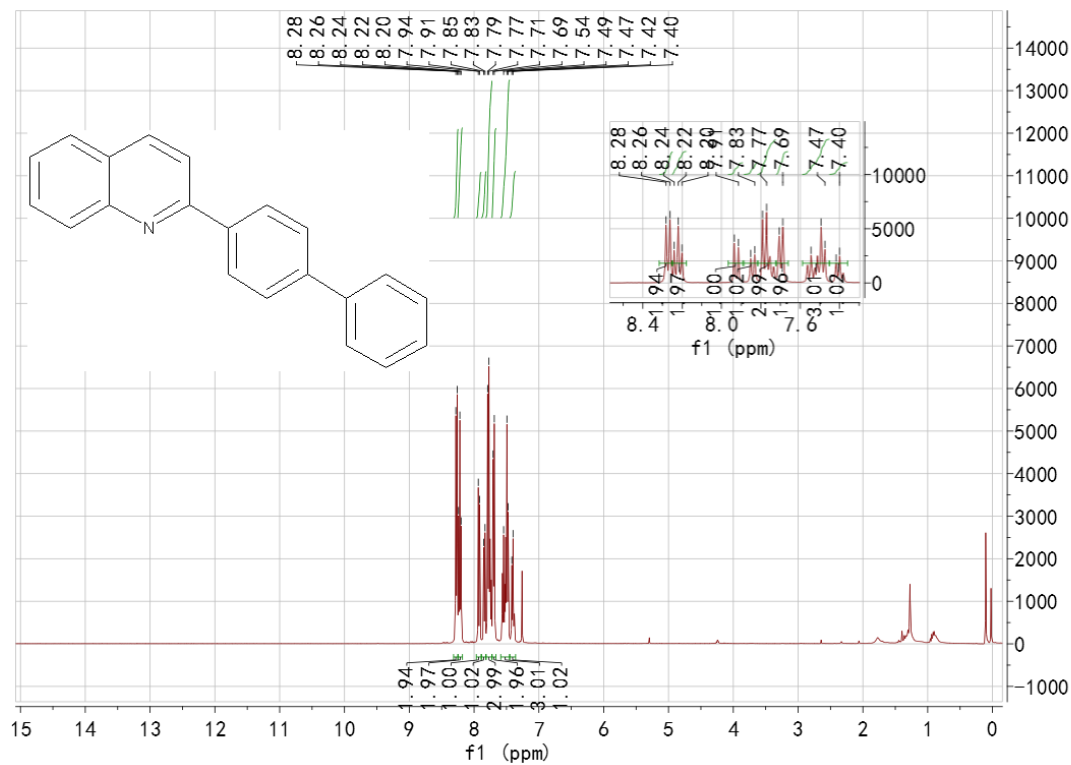

<sup>13</sup>C NMR of compound **3d**

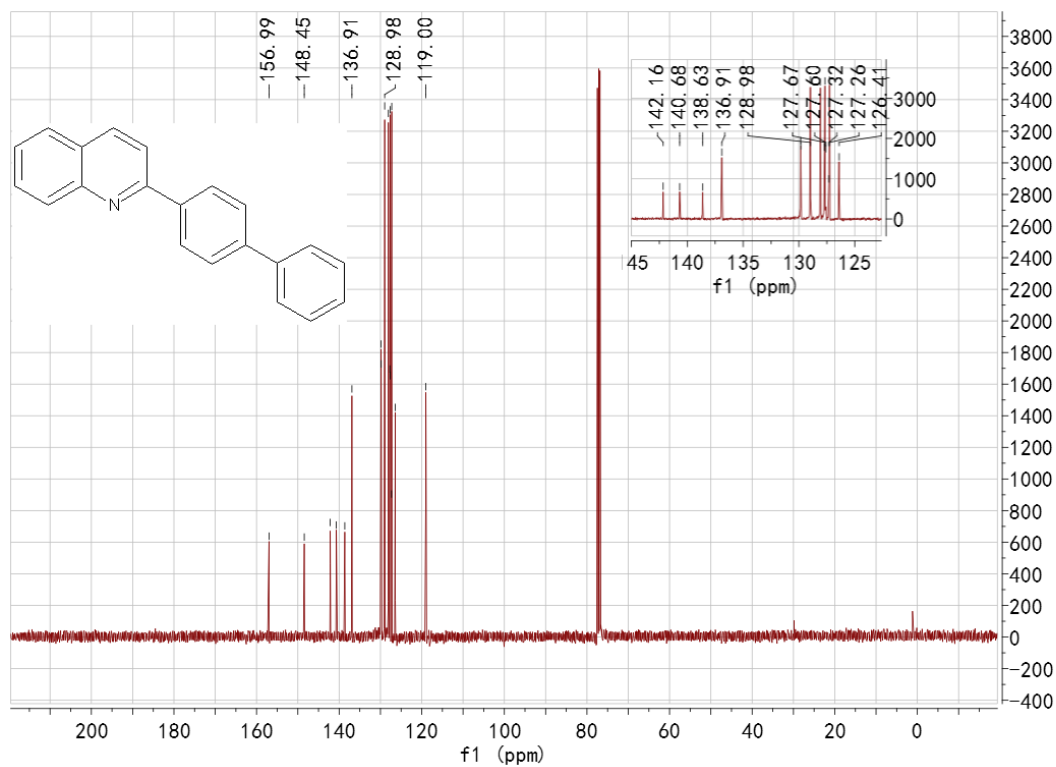

<sup>1</sup>H NMR of compound **3e**

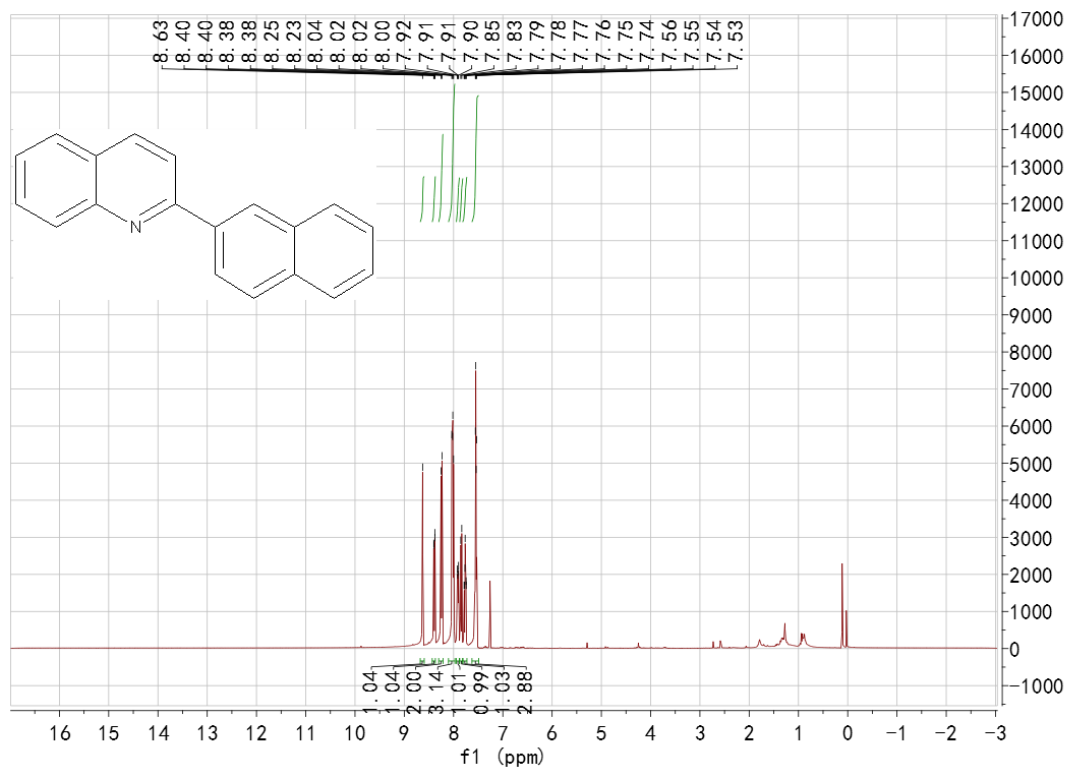

<sup>13</sup>C NMR of compound **3e**

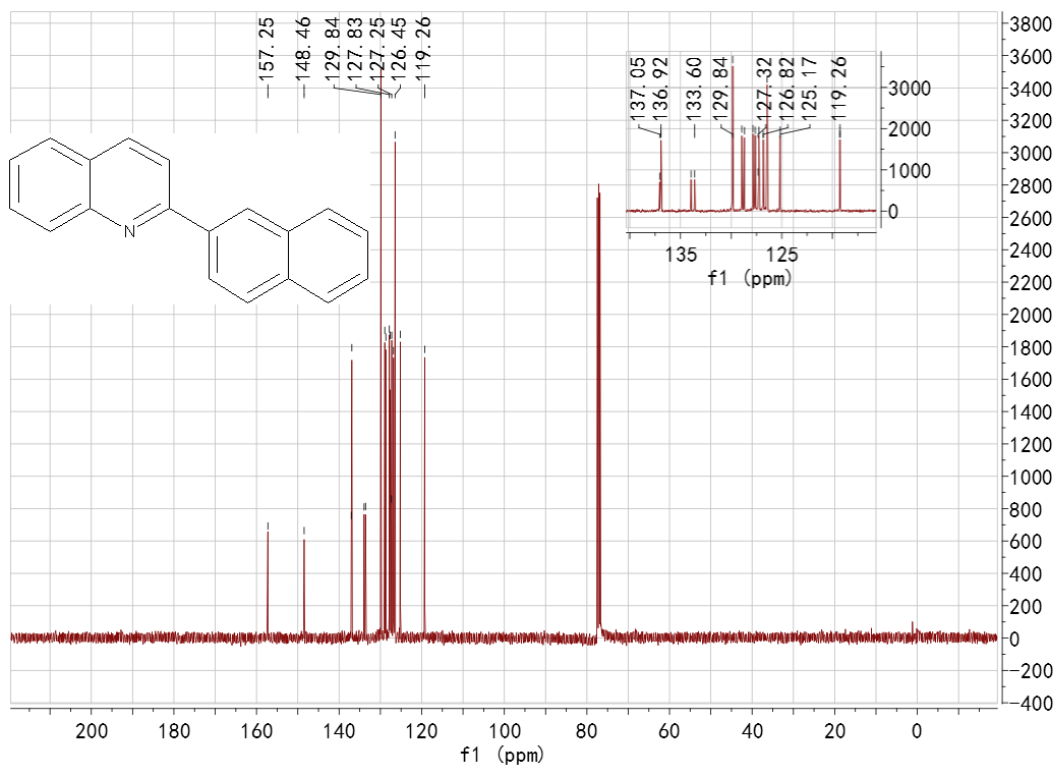

<sup>1</sup>H NMR of compound **3f**

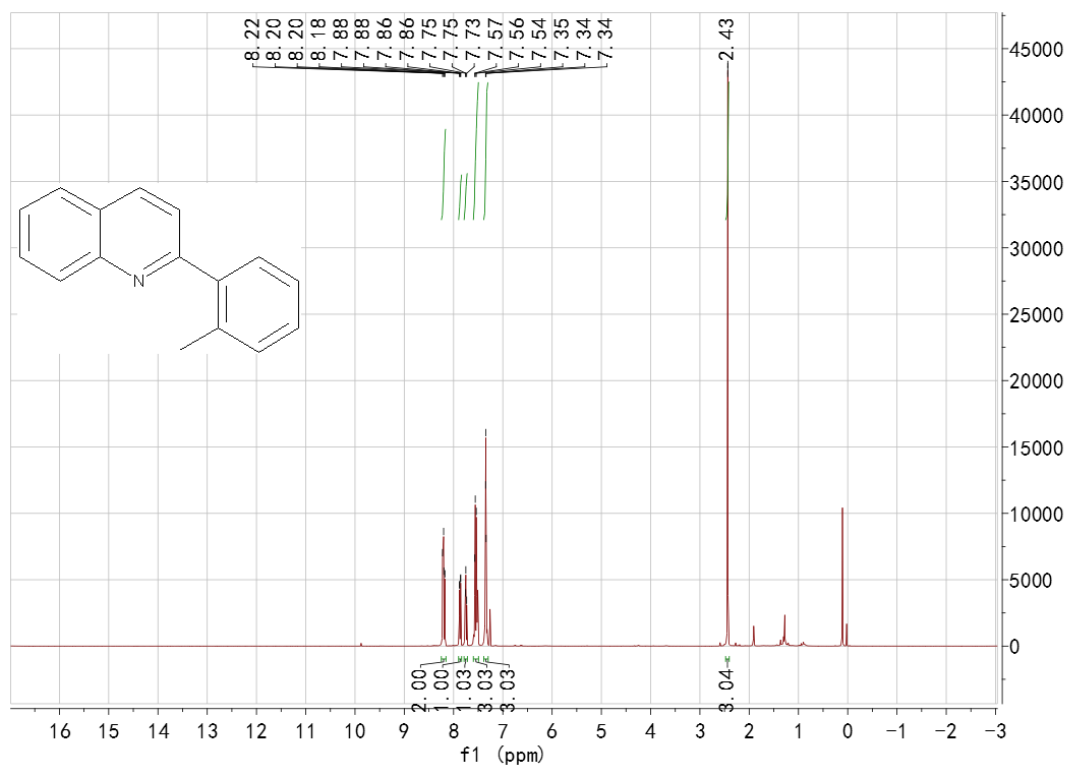

<sup>13</sup>C NMR of compound **3f**

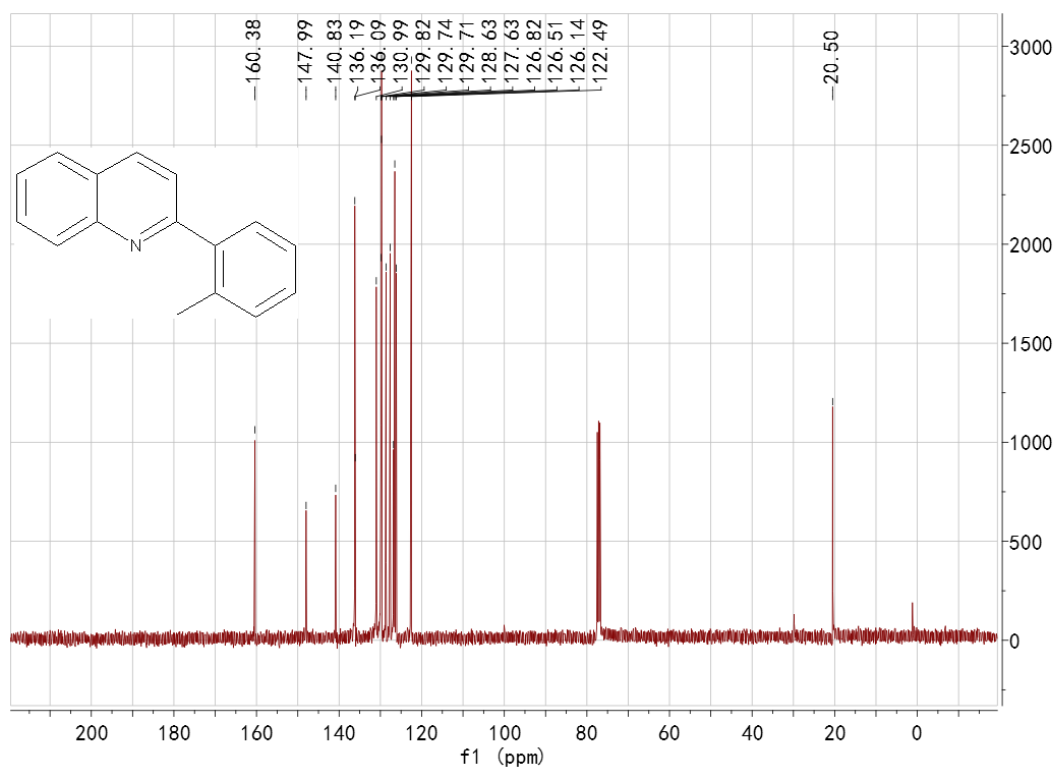

<sup>1</sup>H NMR of compound **3g**

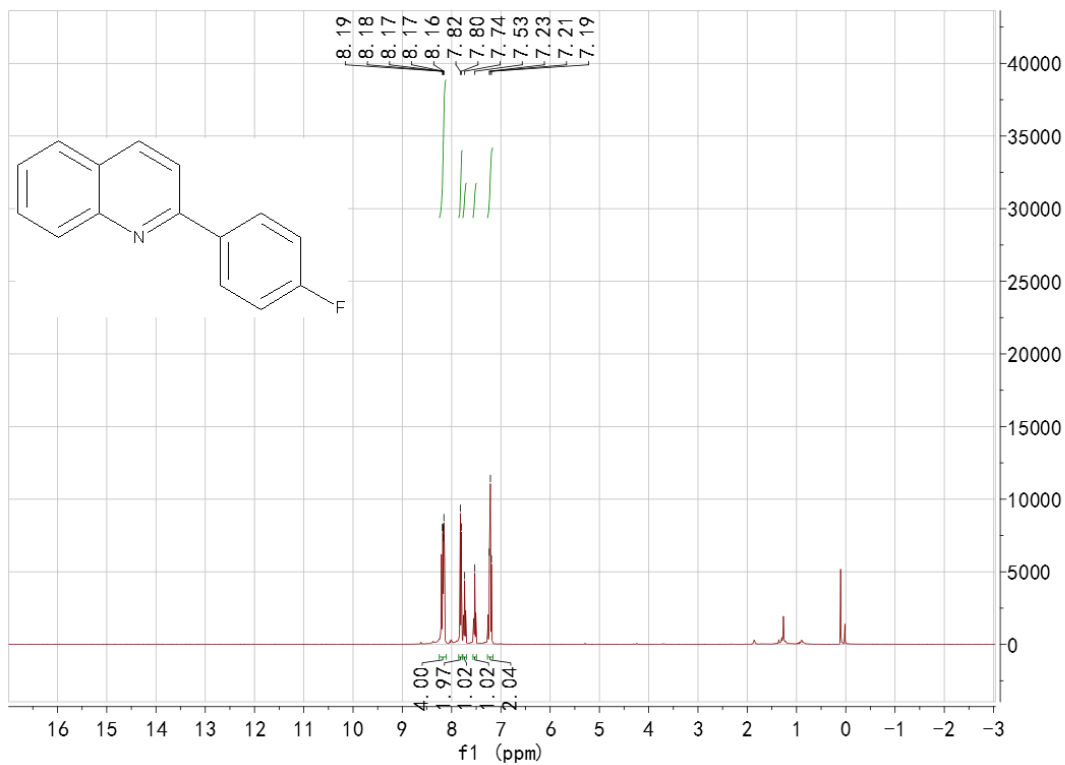

<sup>13</sup>C NMR of compound **3g**

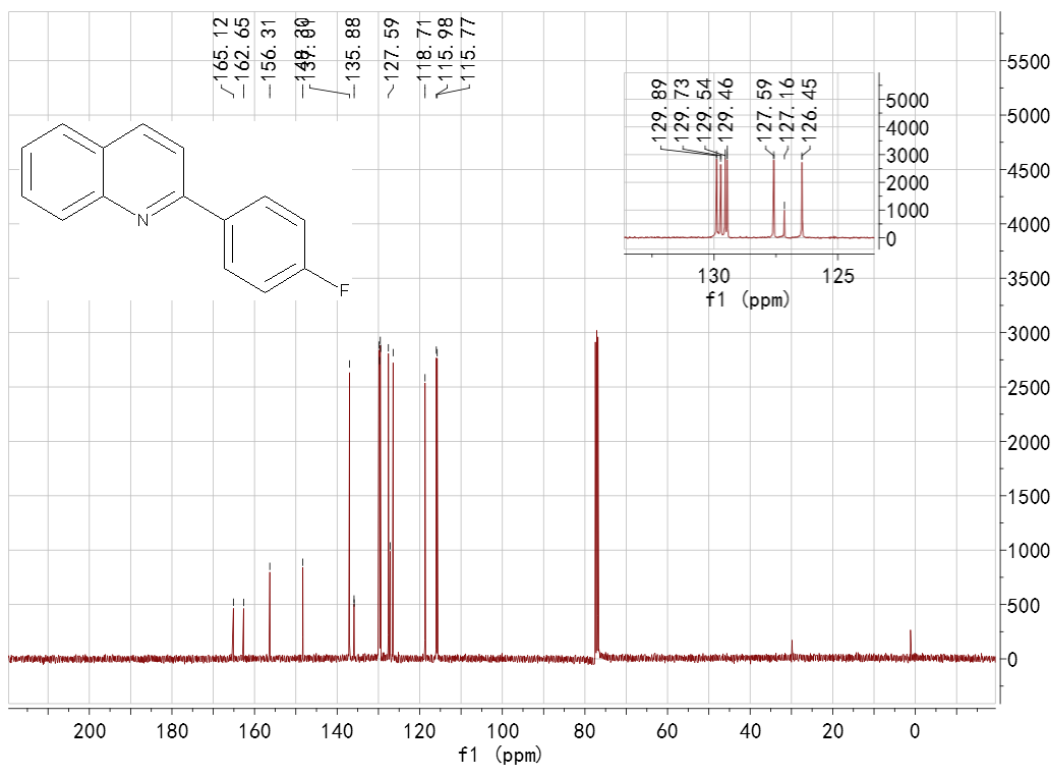

<sup>1</sup>H NMR of compound **3h**

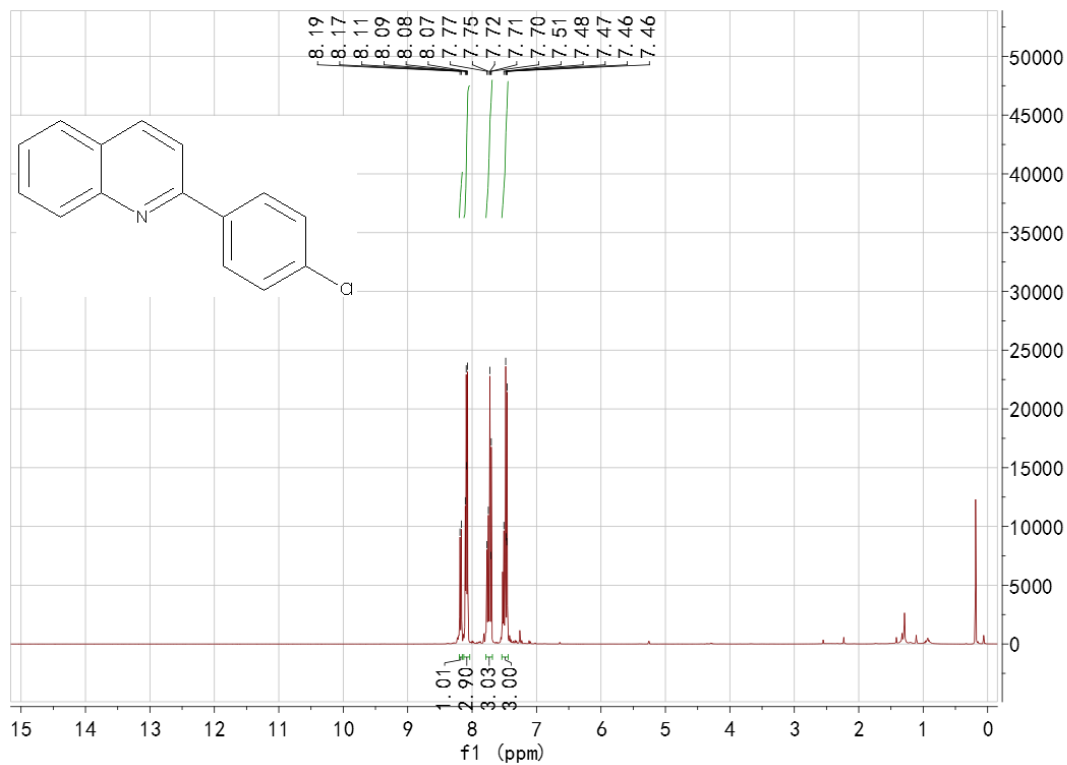

<sup>13</sup>C NMR of compound **3h**

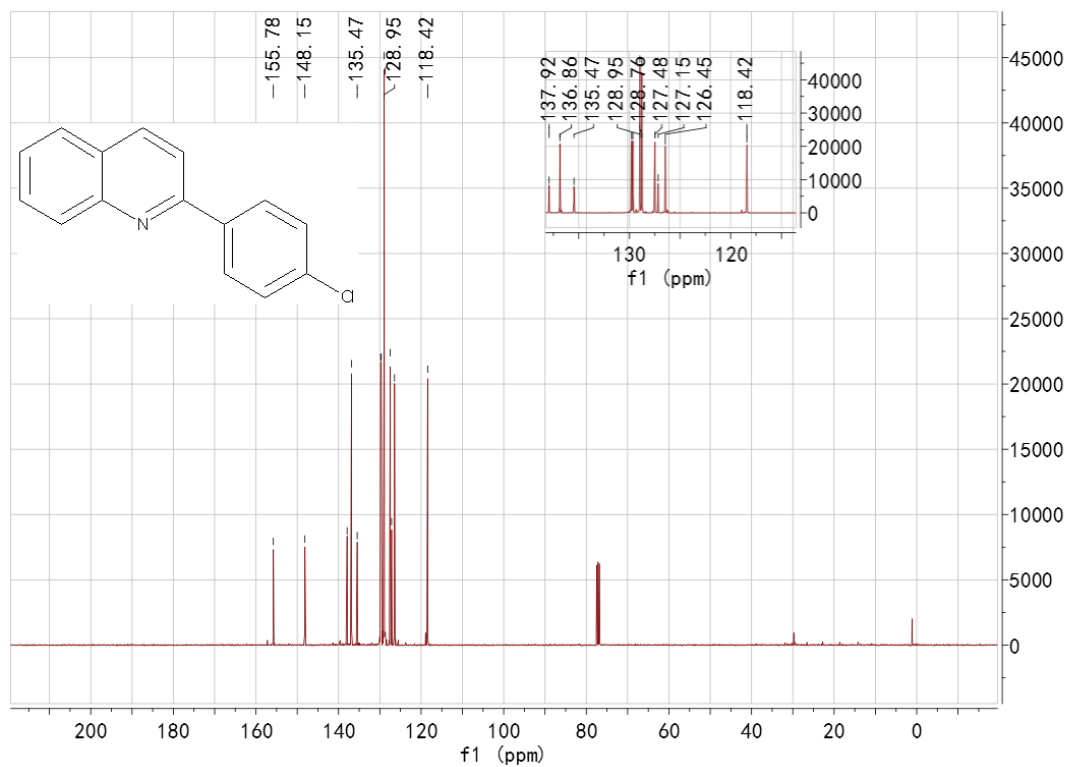



<sup>1</sup>H NMR of compound **3i**

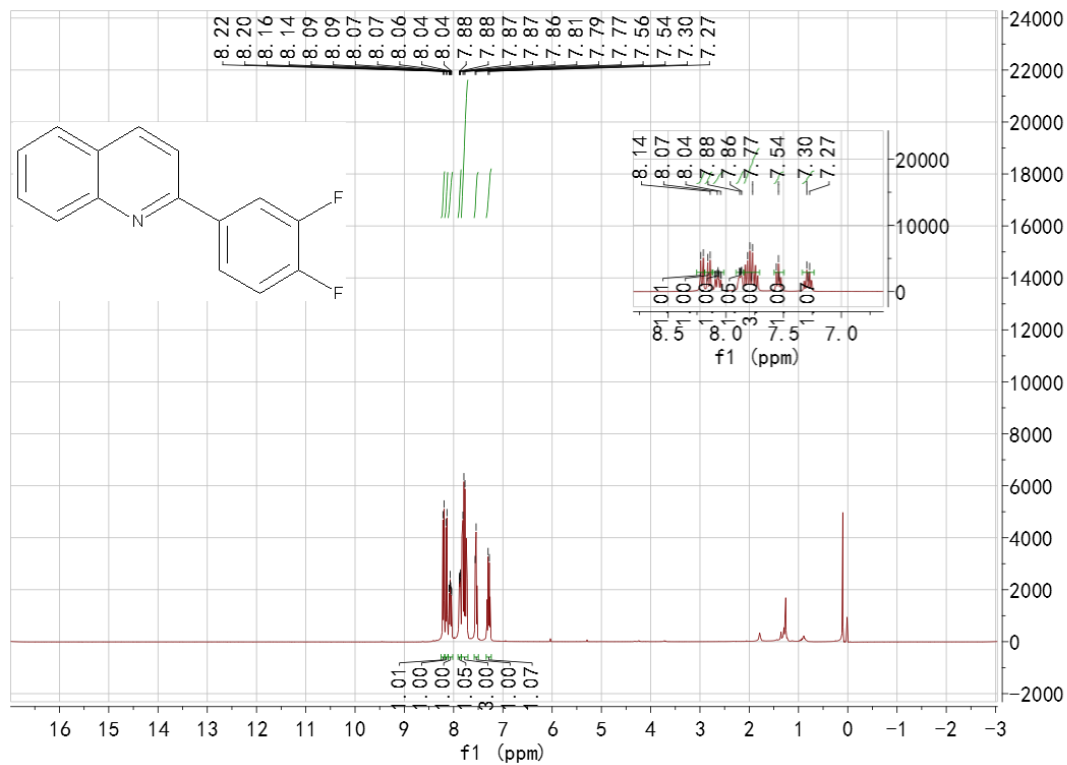

<sup>13</sup>C NMR of compound **3i**

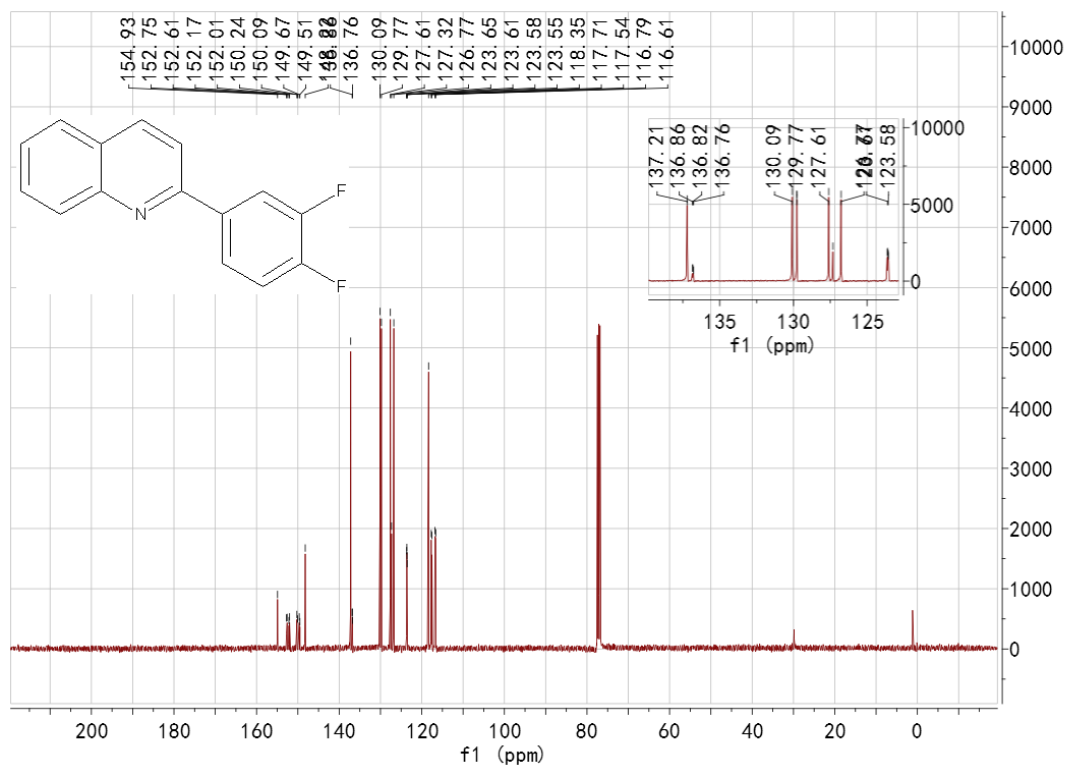

<sup>1</sup>H NMR of compound **3j**

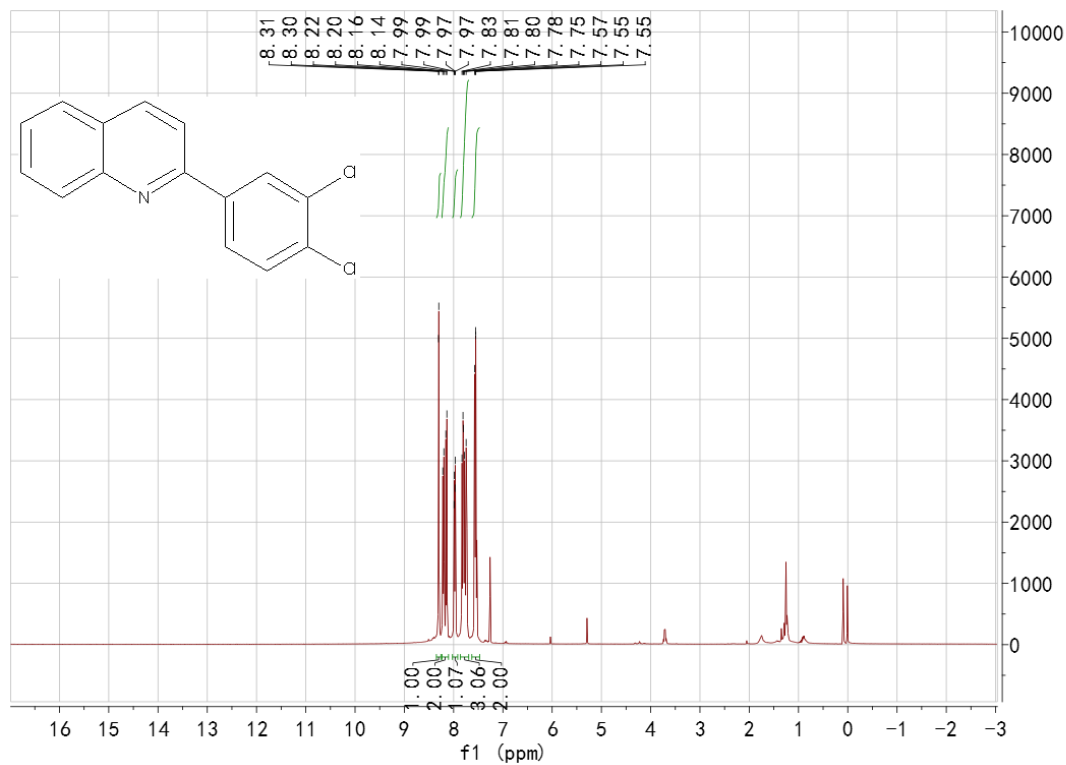

<sup>13</sup>C NMR of compound **3j**

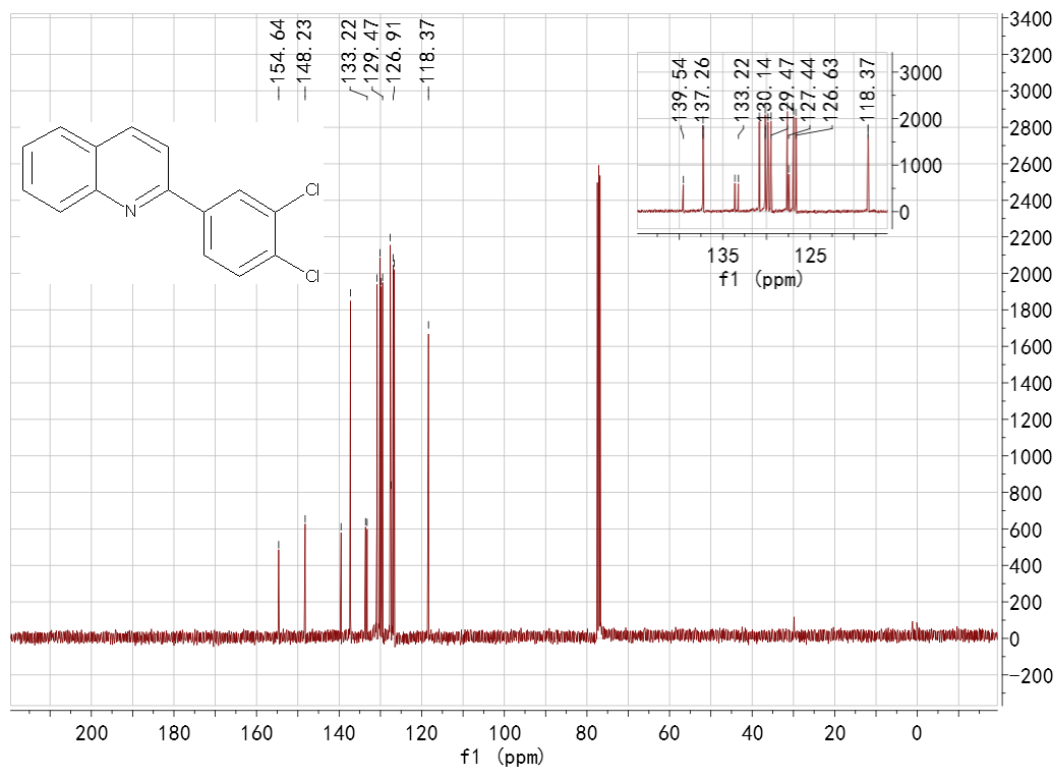

<sup>1</sup>H NMR of compound **3k**

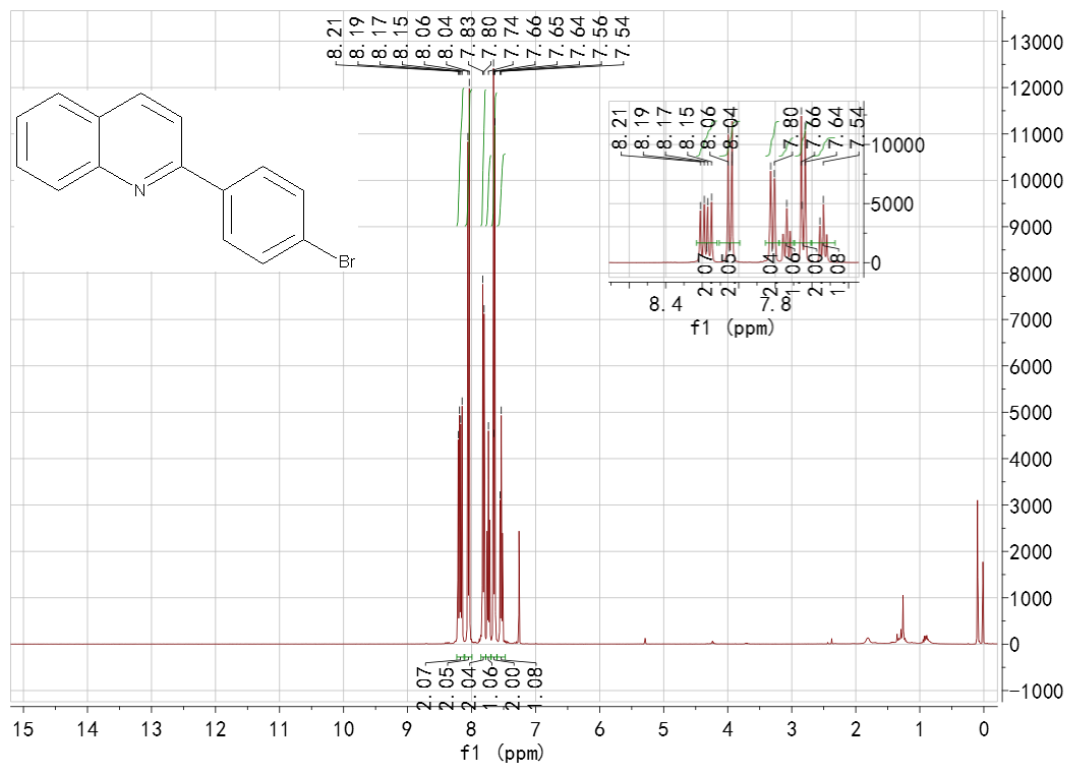

<sup>13</sup>C NMR of compound **3k**

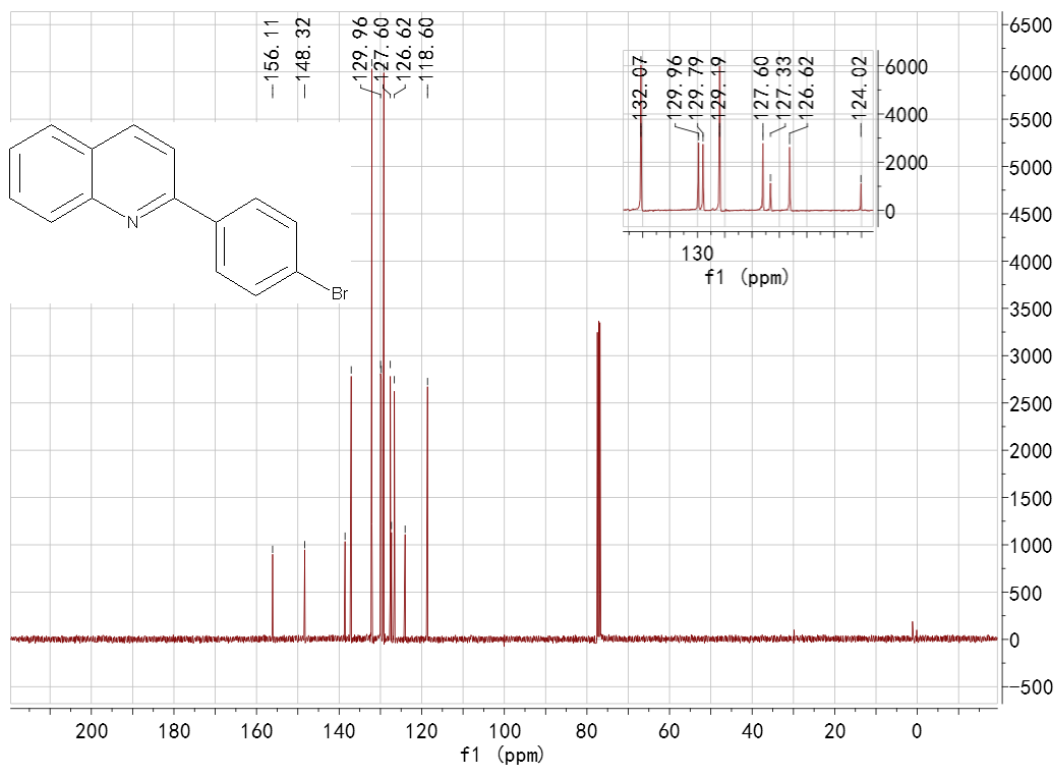

<sup>1</sup>H NMR of compound **3I**

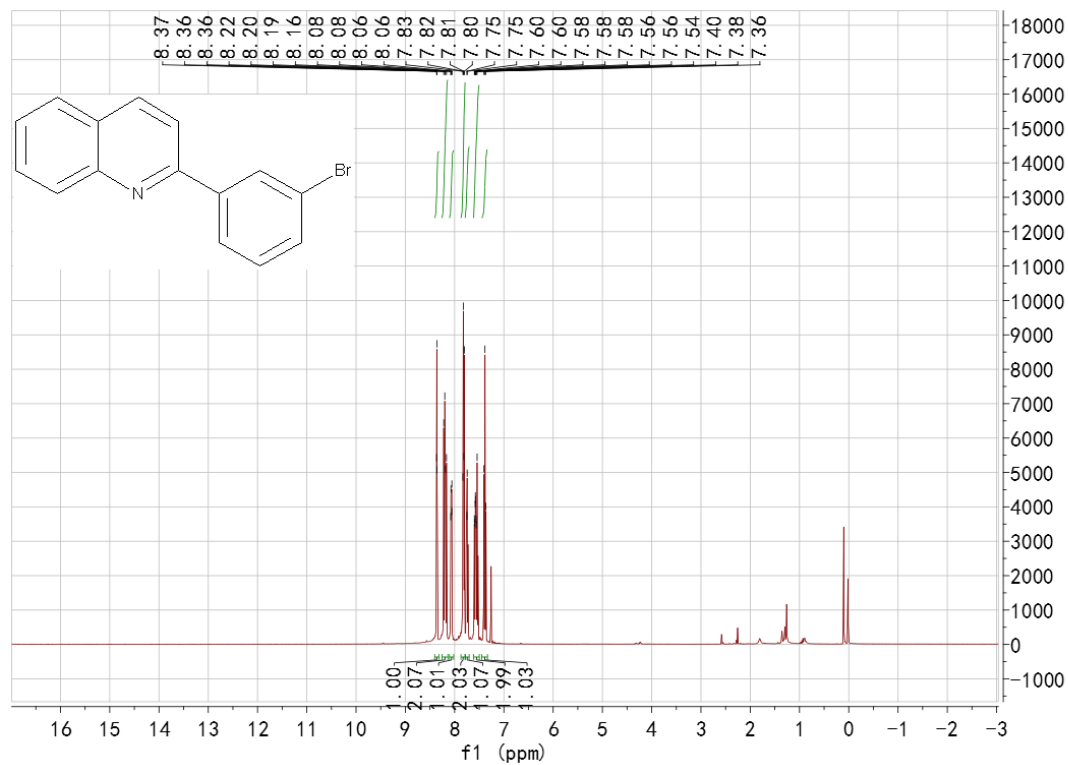

<sup>13</sup>C NMR of compound **3I**

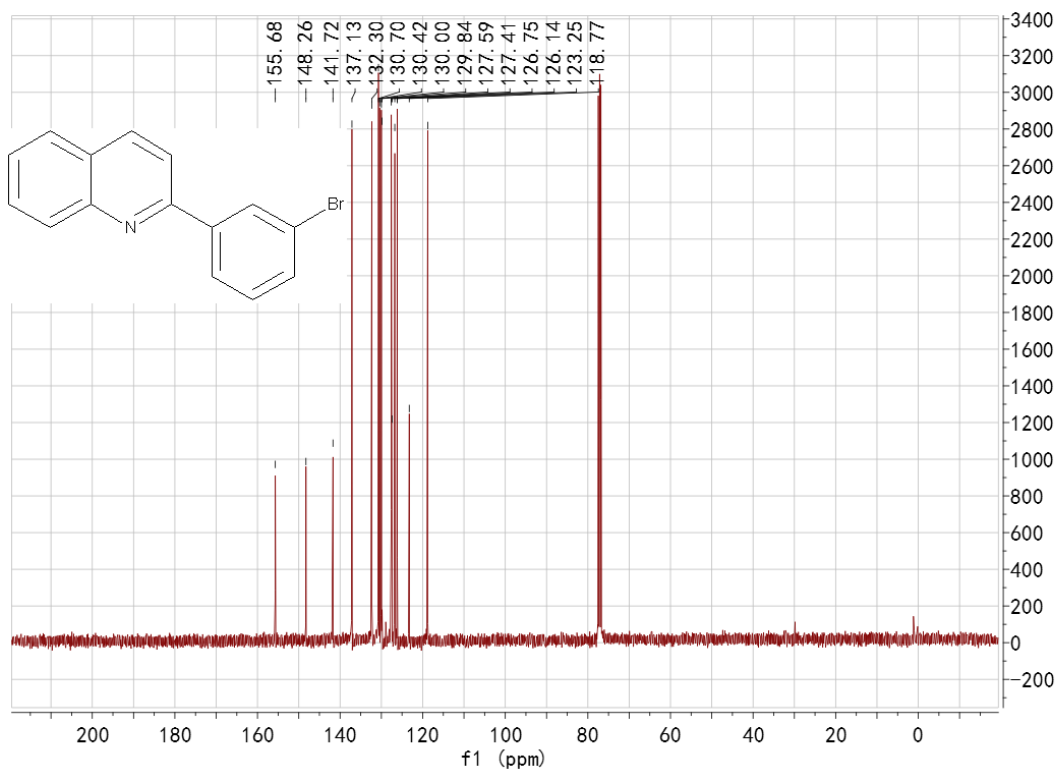

<sup>1</sup>H NMR of compound **3m**

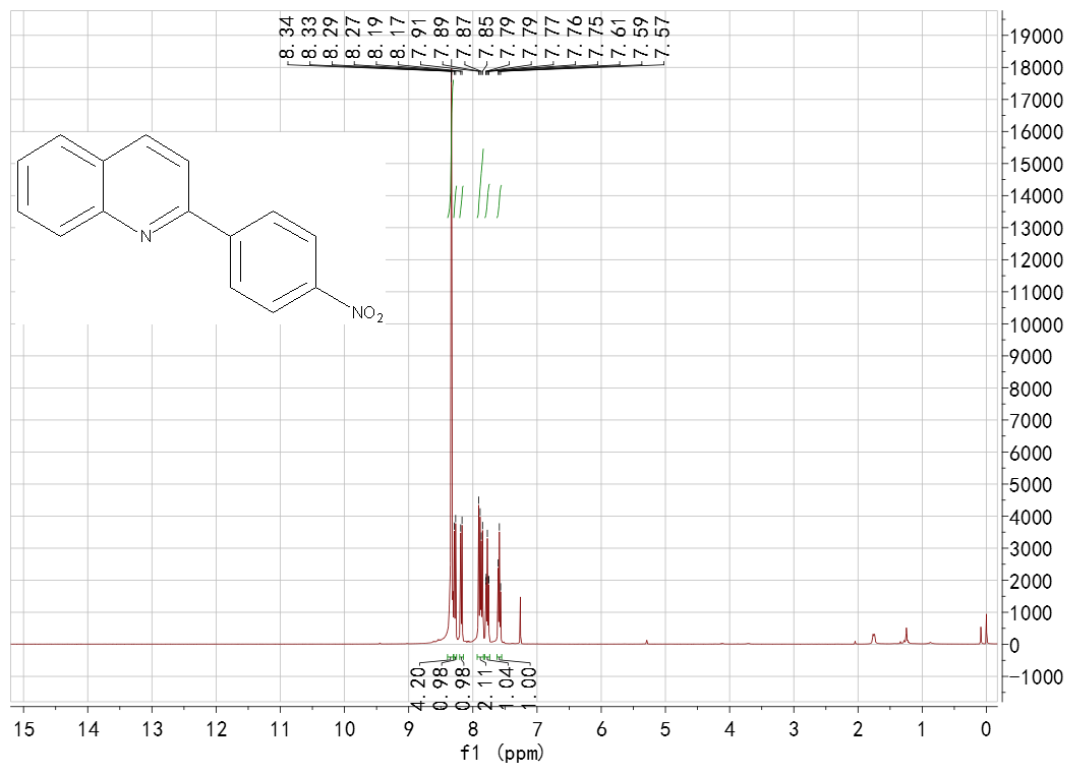

<sup>13</sup>C NMR of compound **3m**

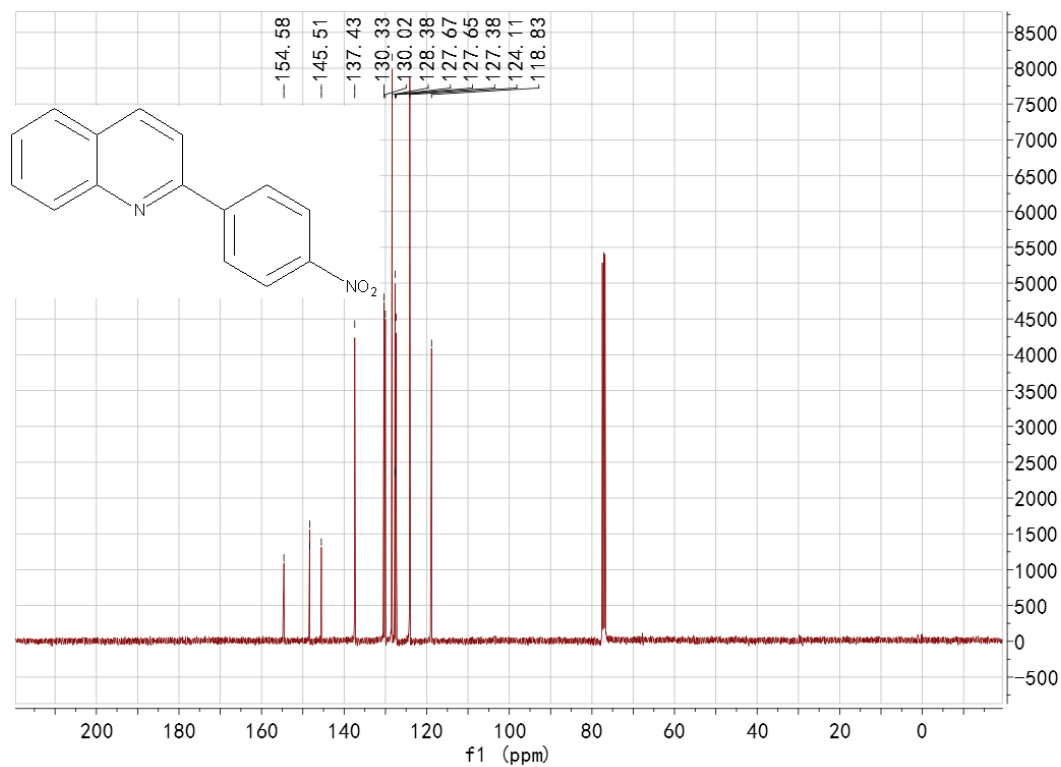

<sup>1</sup>H NMR of compound **3n**

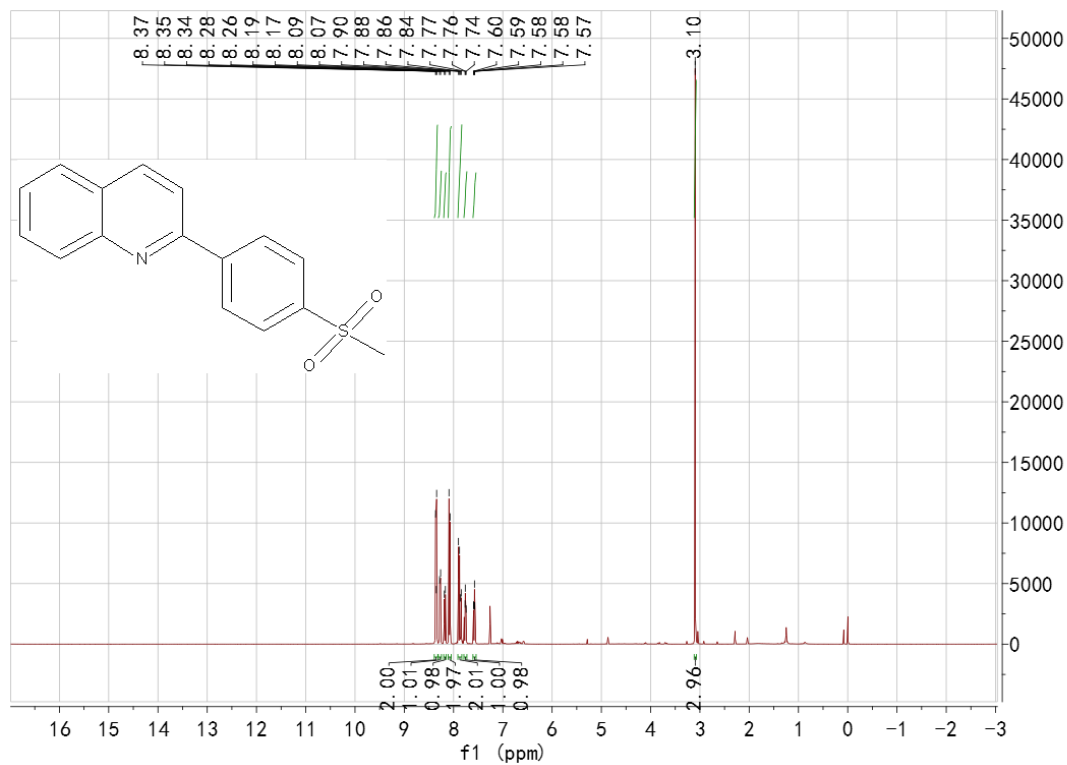

<sup>13</sup>C NMR of compound **3n**

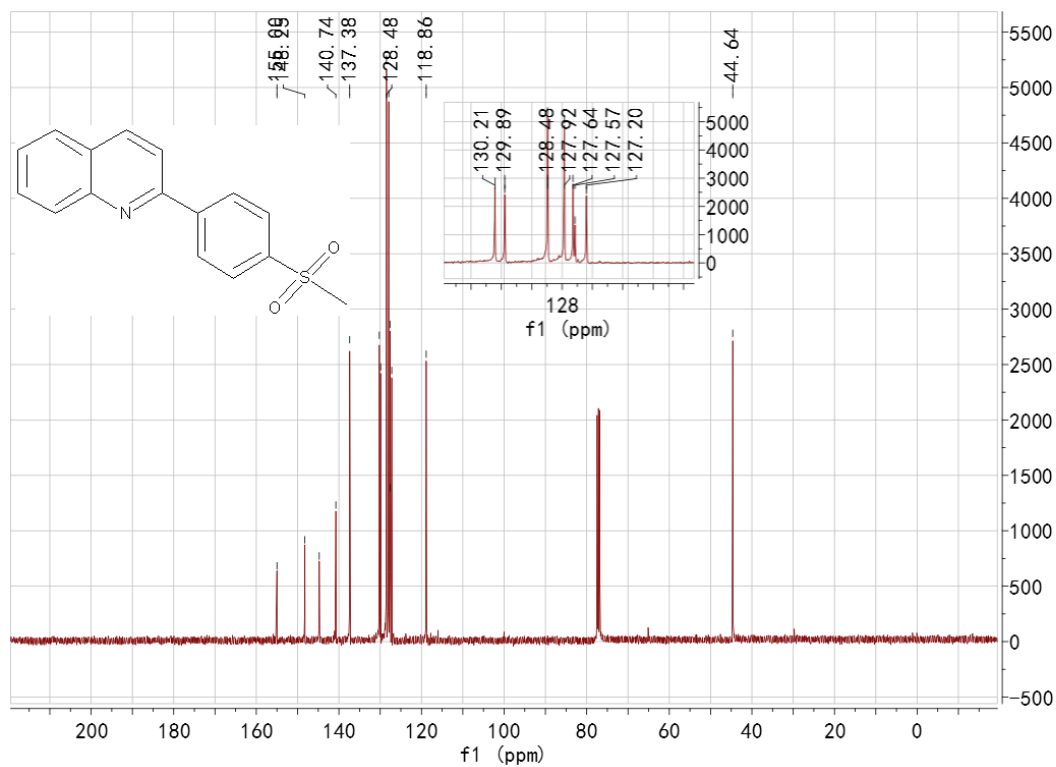

<sup>1</sup>H NMR of compound **3o**

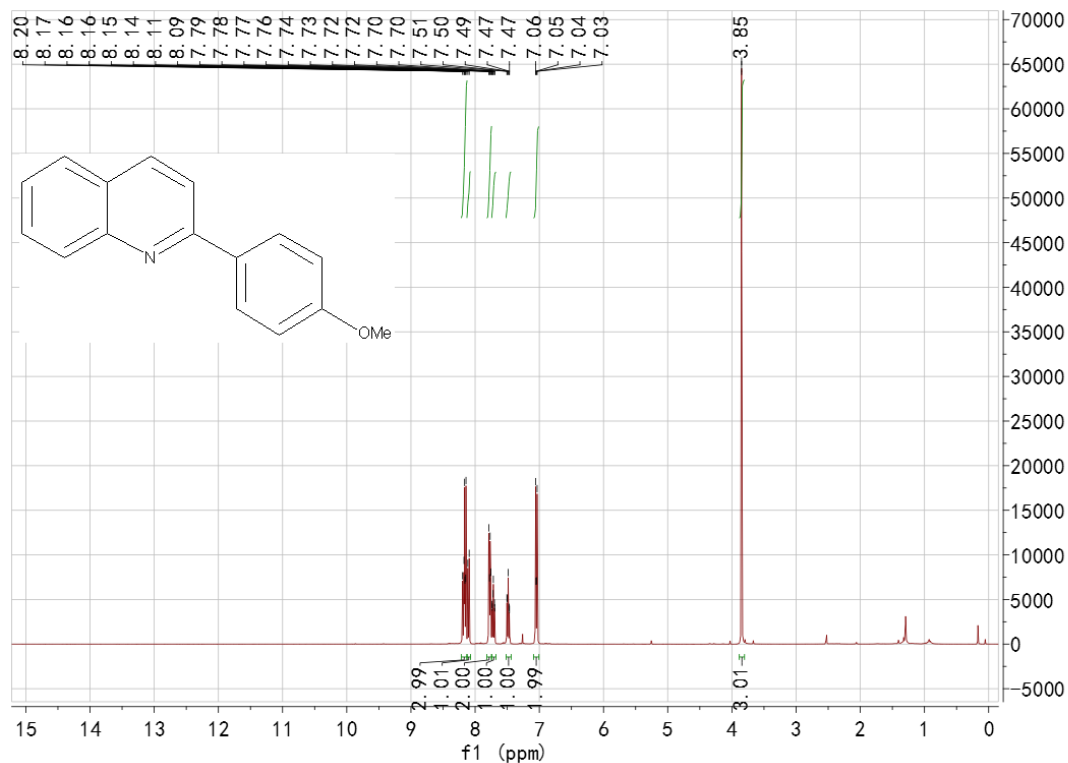

<sup>13</sup>C NMR of compound **3o**

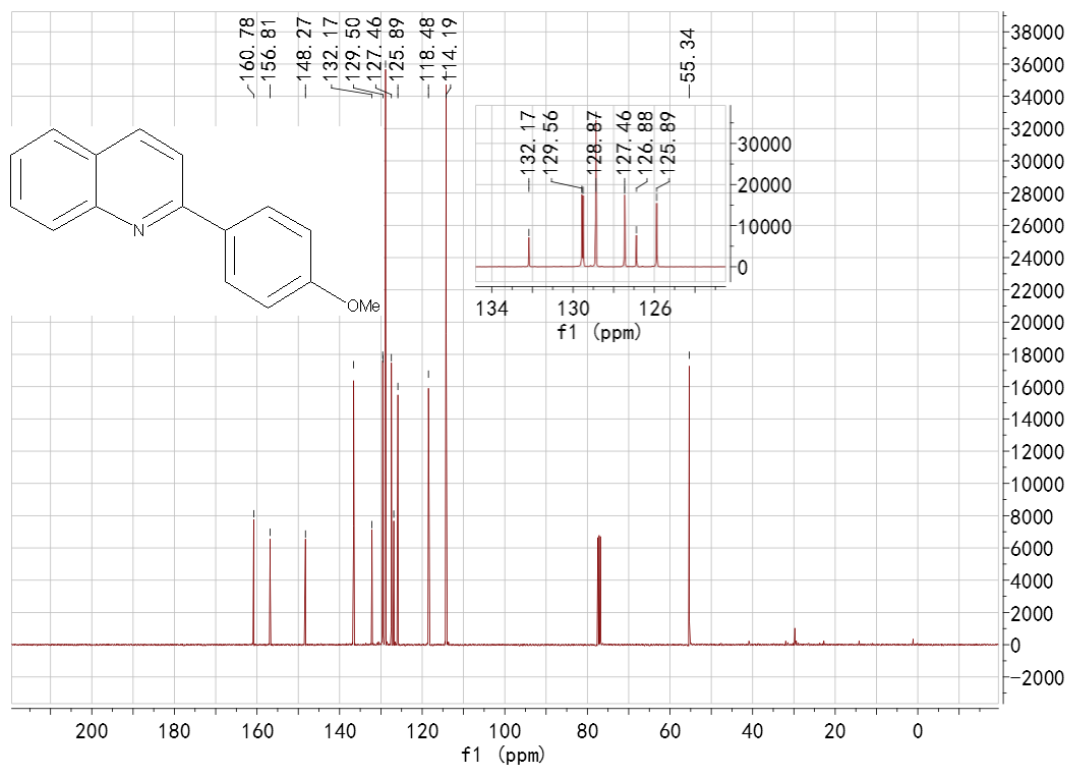

<sup>1</sup>H NMR of compound **3p**

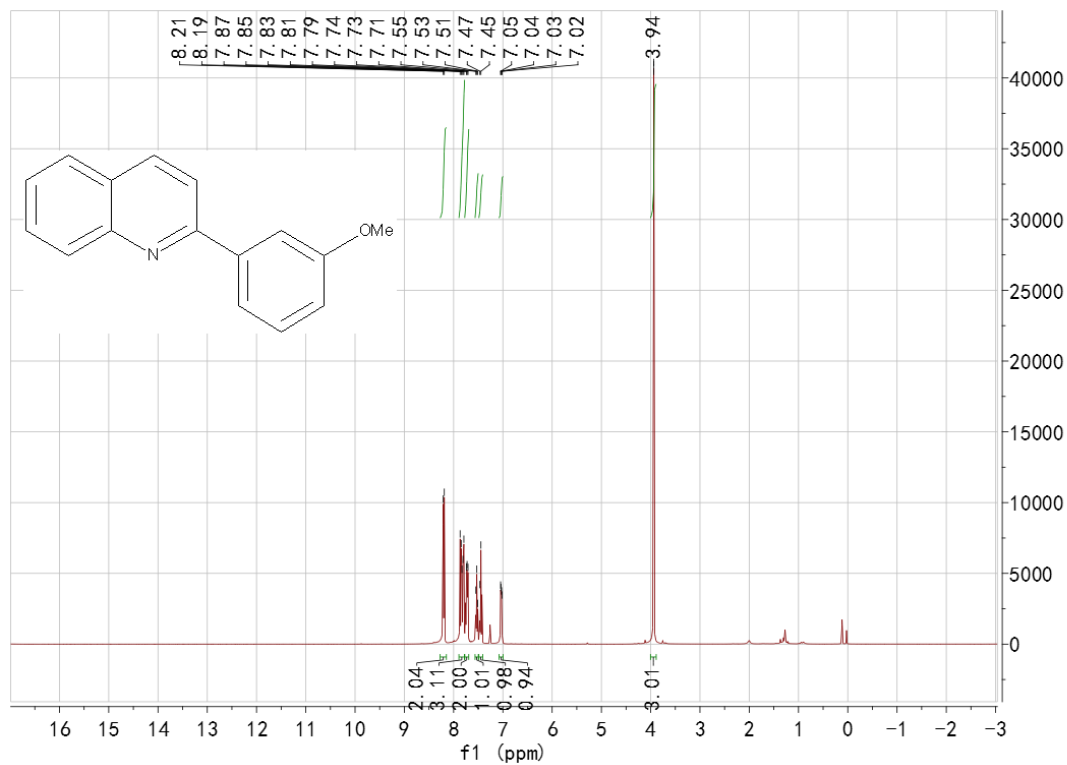

<sup>13</sup>C NMR of compound **3p**

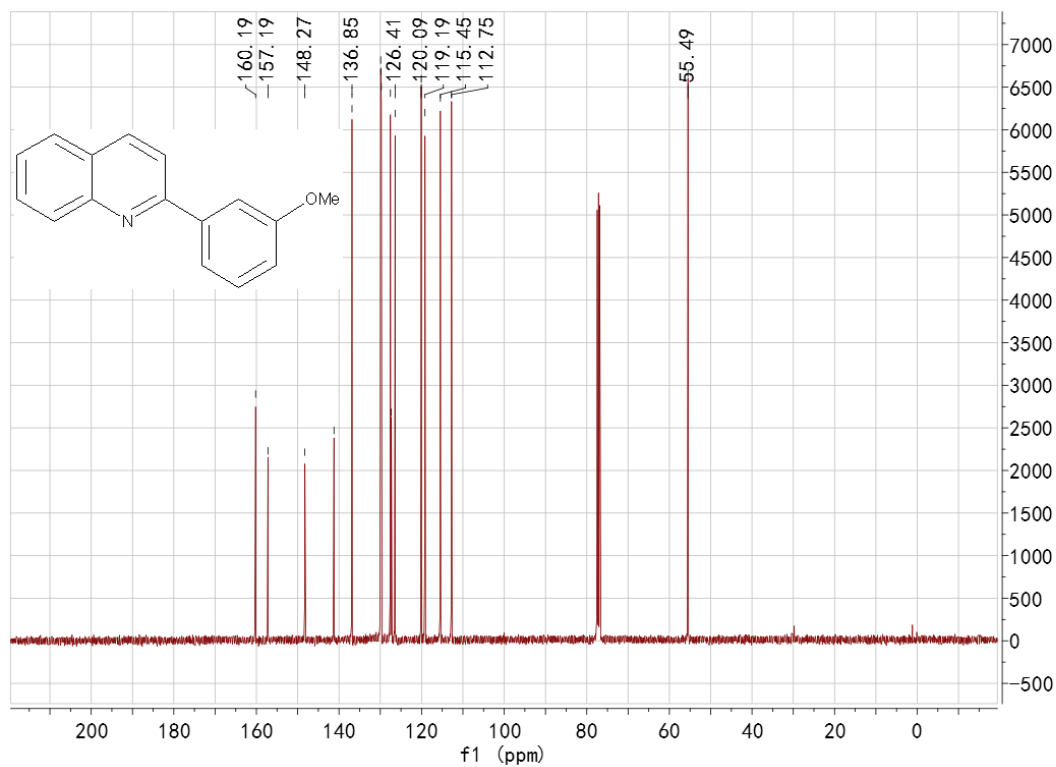



<sup>1</sup>H NMR of compound **3q**

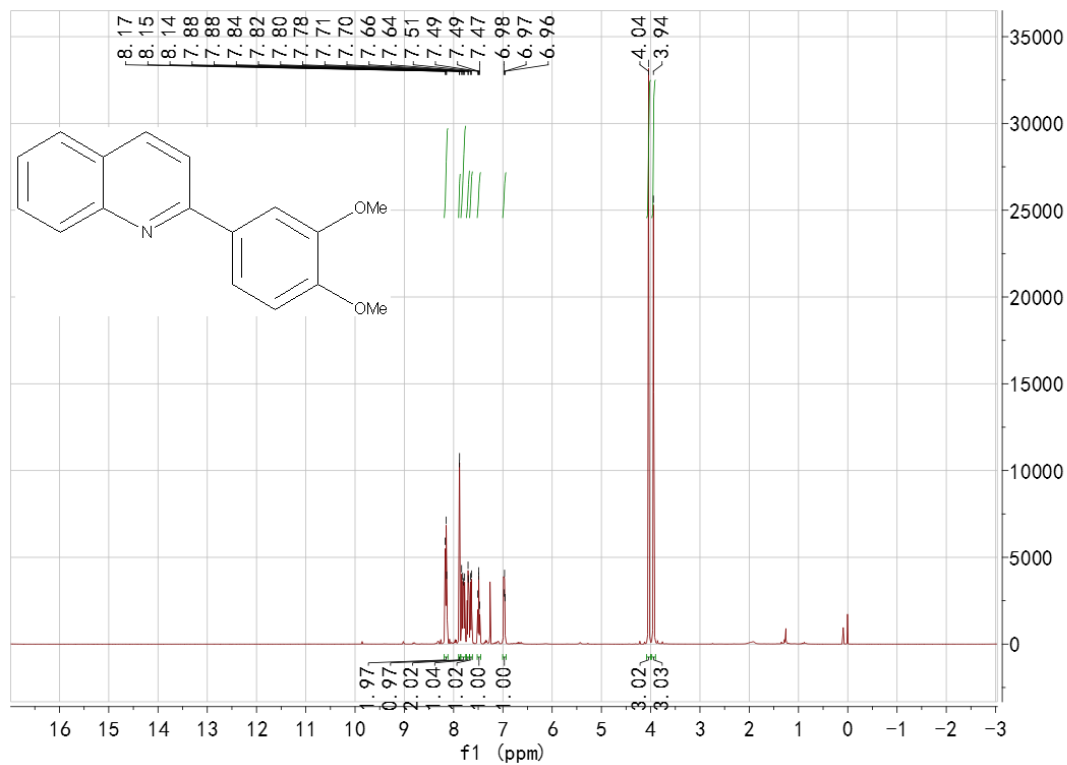

<sup>13</sup>C NMR of compound **3q**

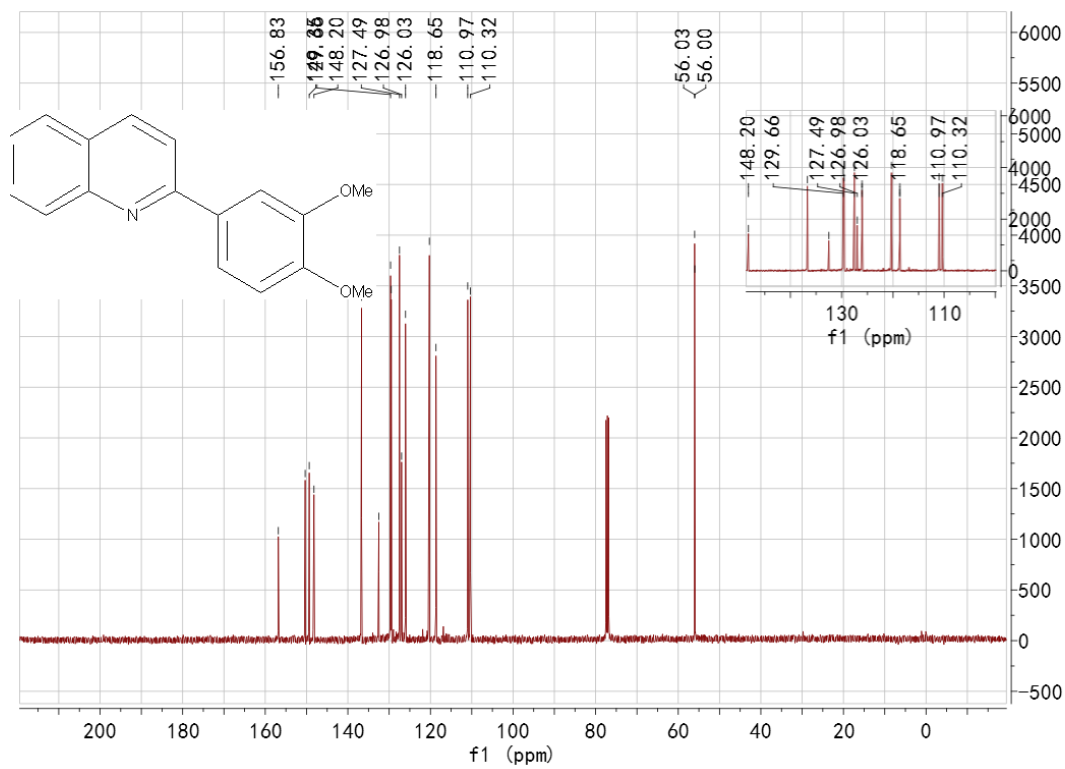

<sup>1</sup>H NMR of compound **3r**

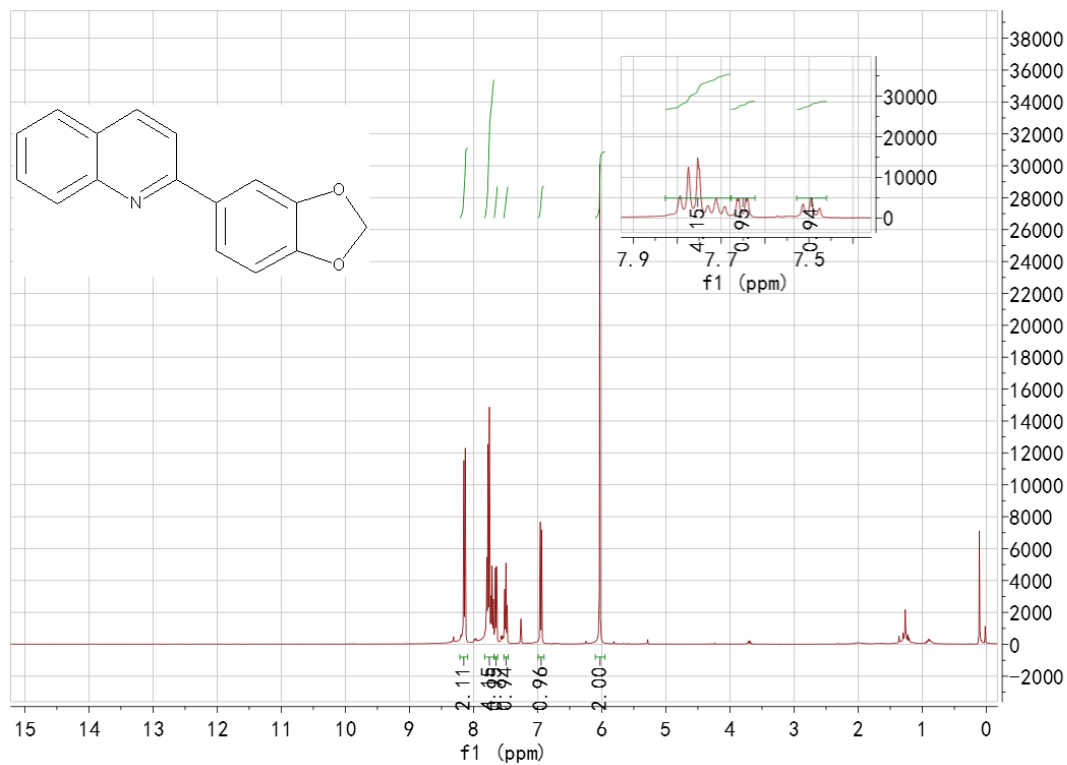

<sup>13</sup>C NMR of compound **3r**

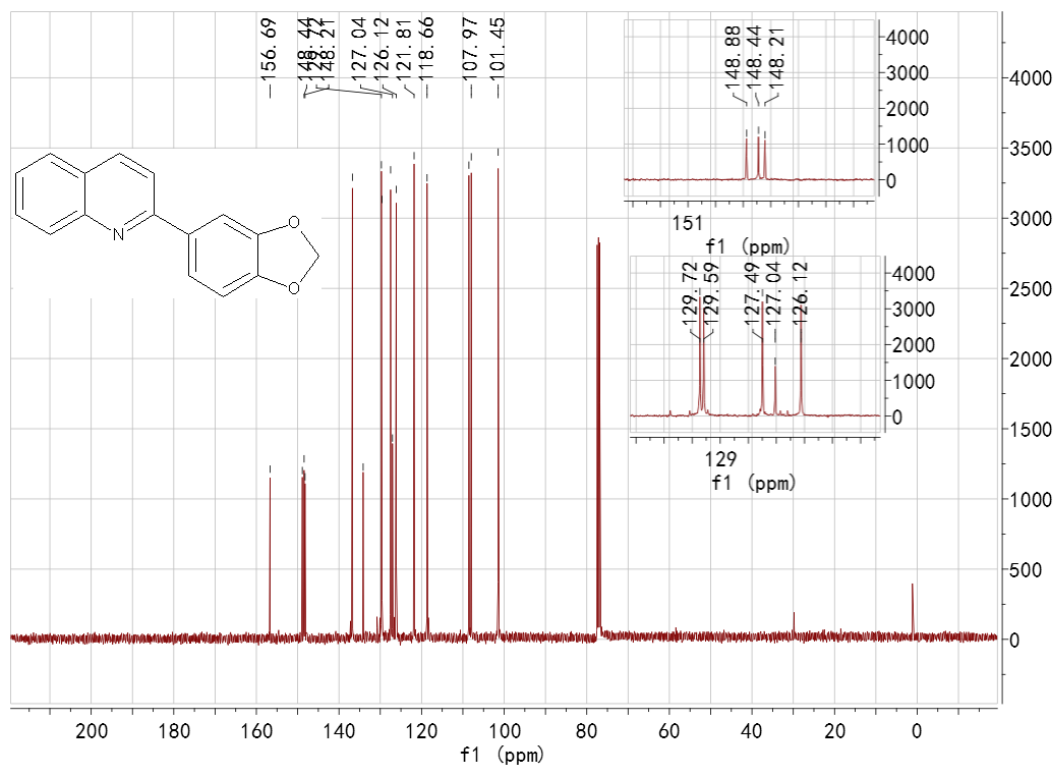

<sup>1</sup>H NMR of compound **3s**

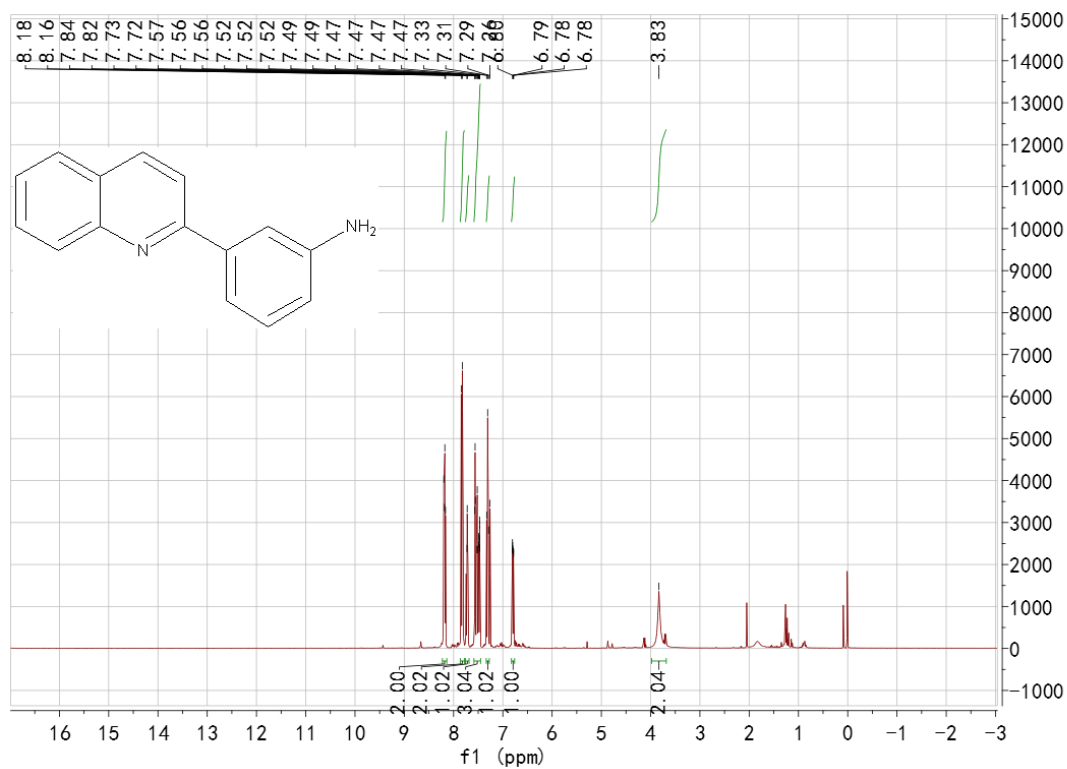

<sup>13</sup>C NMR of compound **3s**

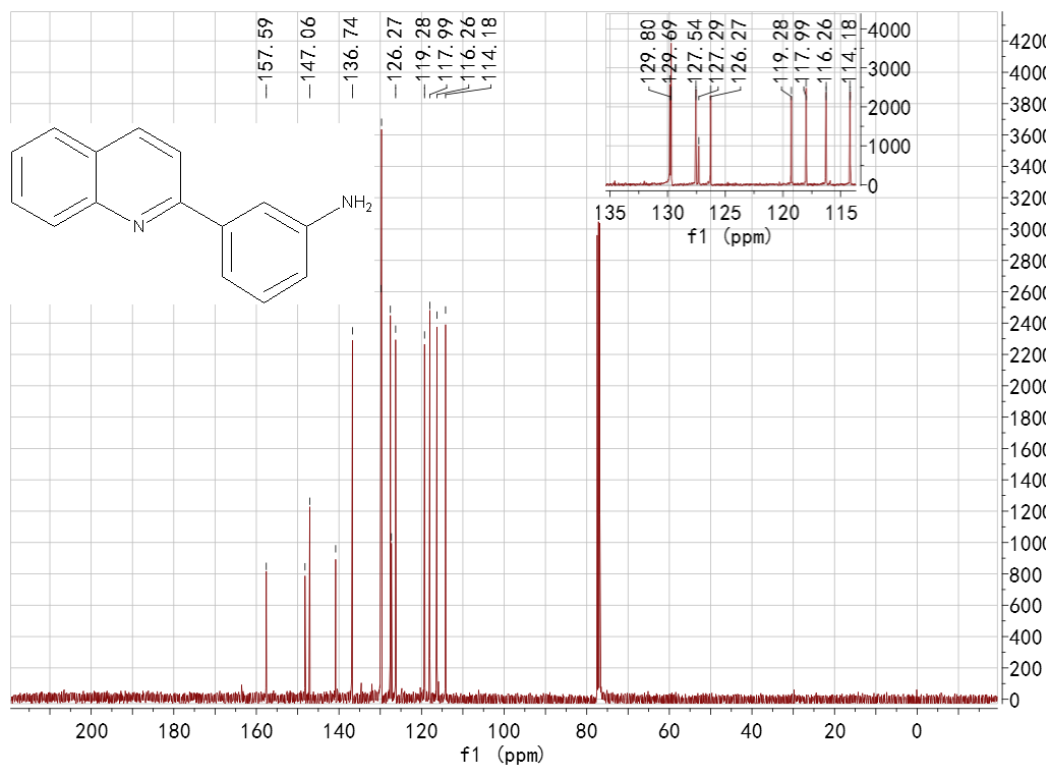

<sup>1</sup>H NMR of compound **3t**

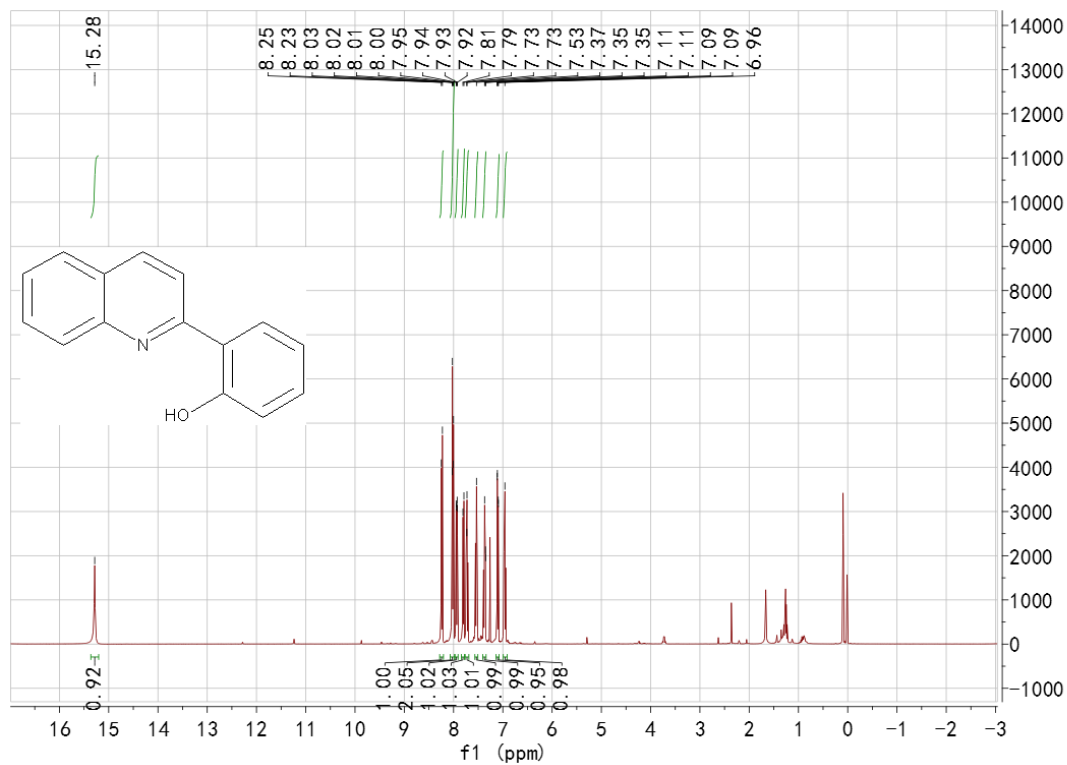

<sup>13</sup>C NMR of compound **3t**

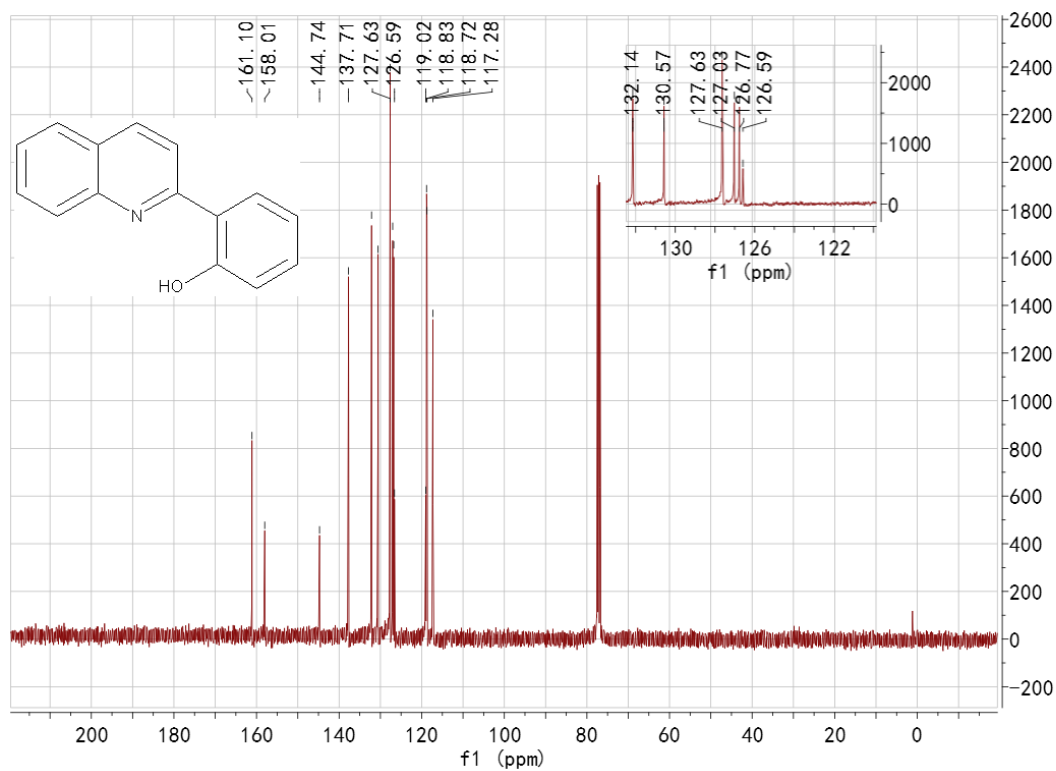

<sup>1</sup>H NMR of compound **3u**

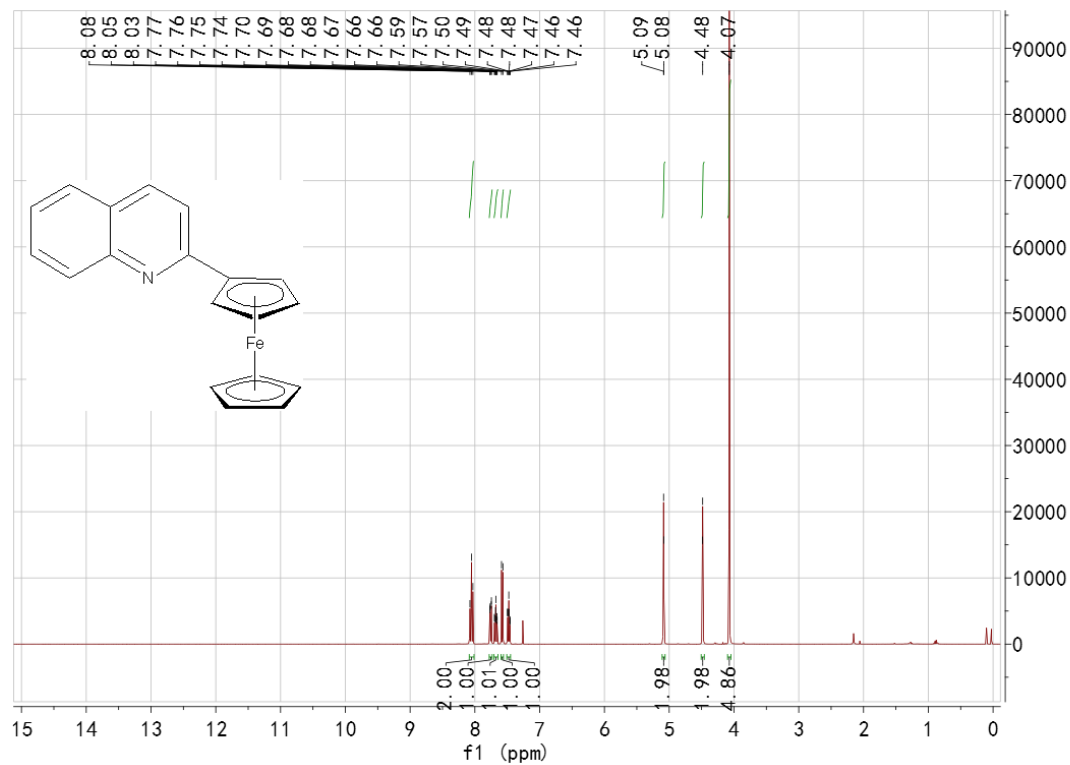

<sup>13</sup>C NMR of compound **3u**

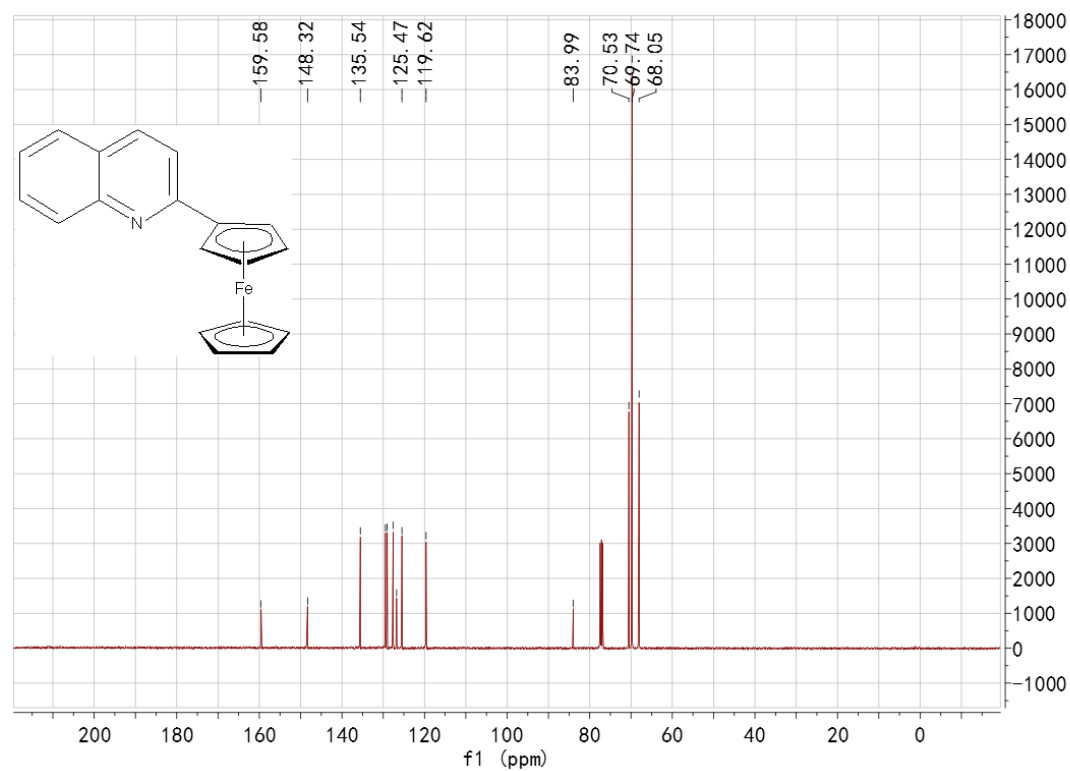

<sup>1</sup>H NMR of compound **3v**

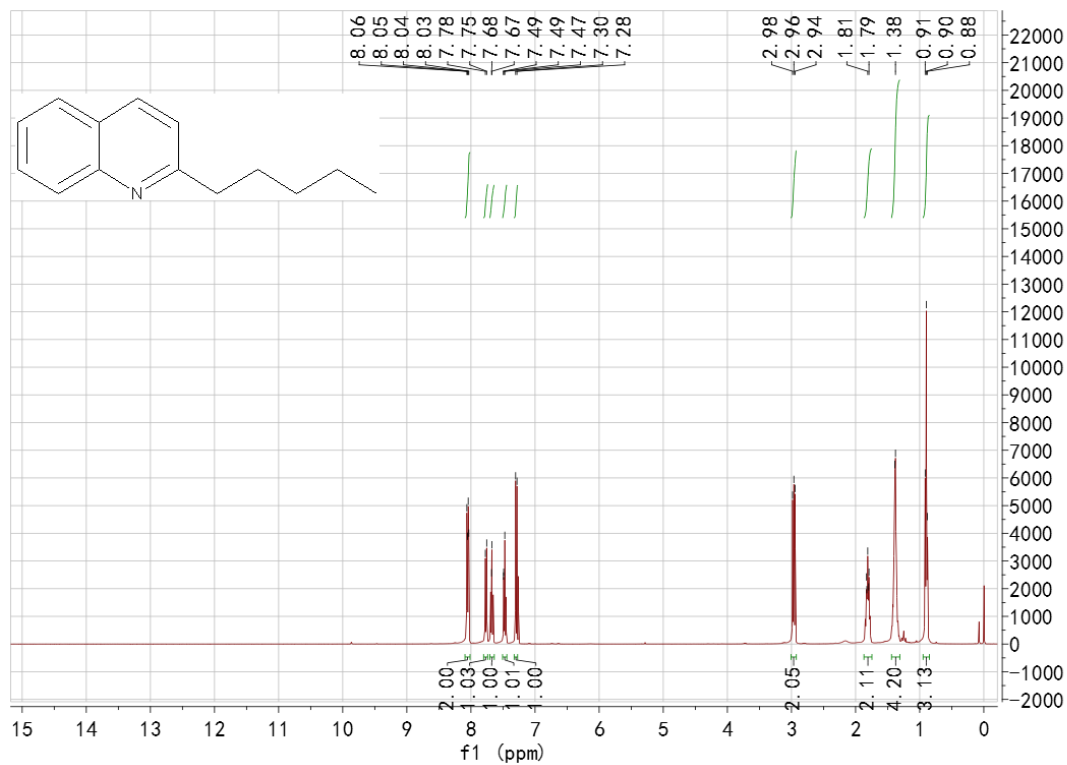

<sup>13</sup>C NMR of compound **3v**

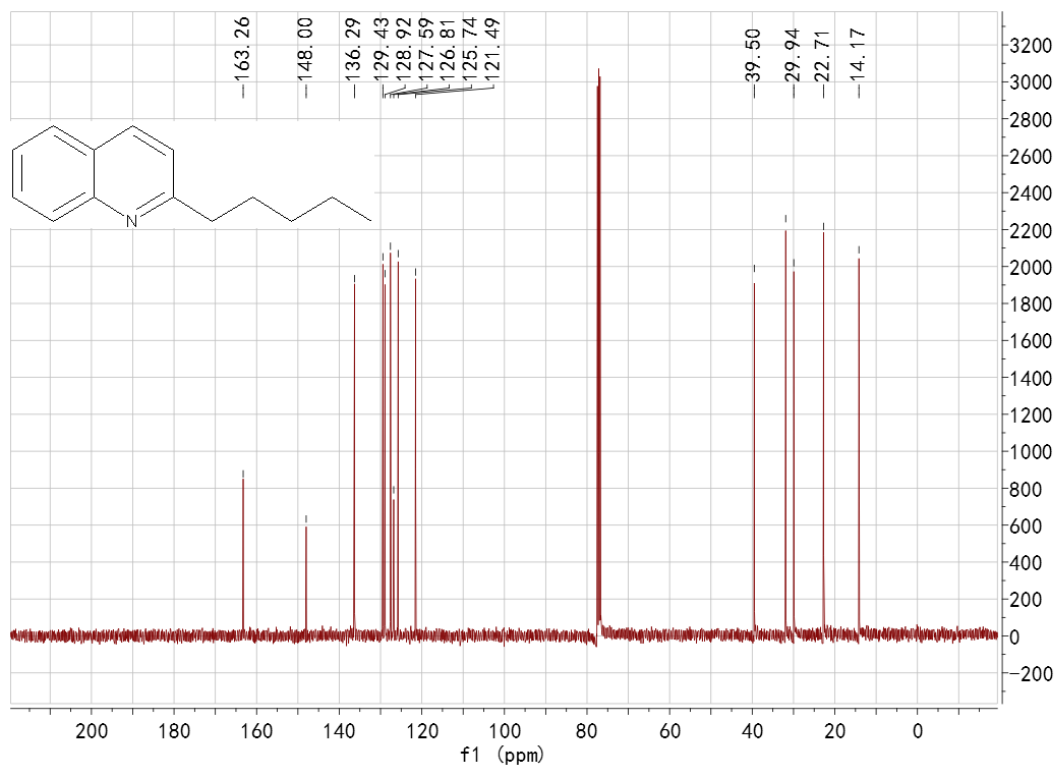

<sup>1</sup>H NMR of compound **3w**

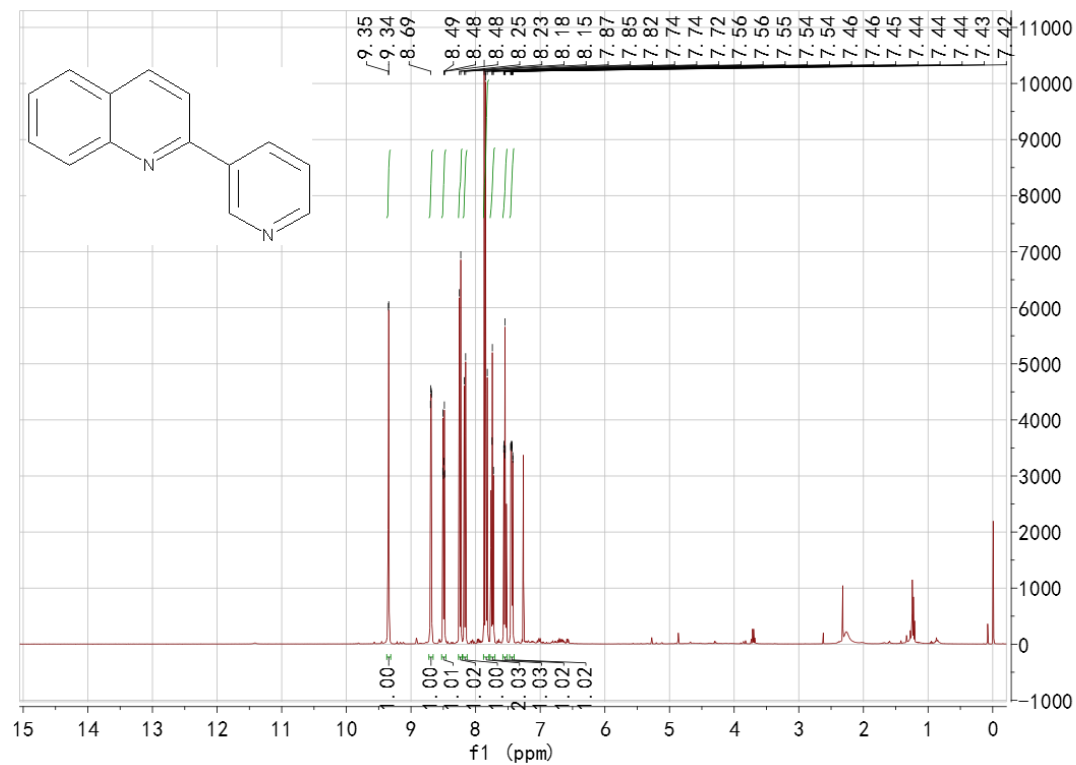

<sup>13</sup>C NMR of compound **3w**

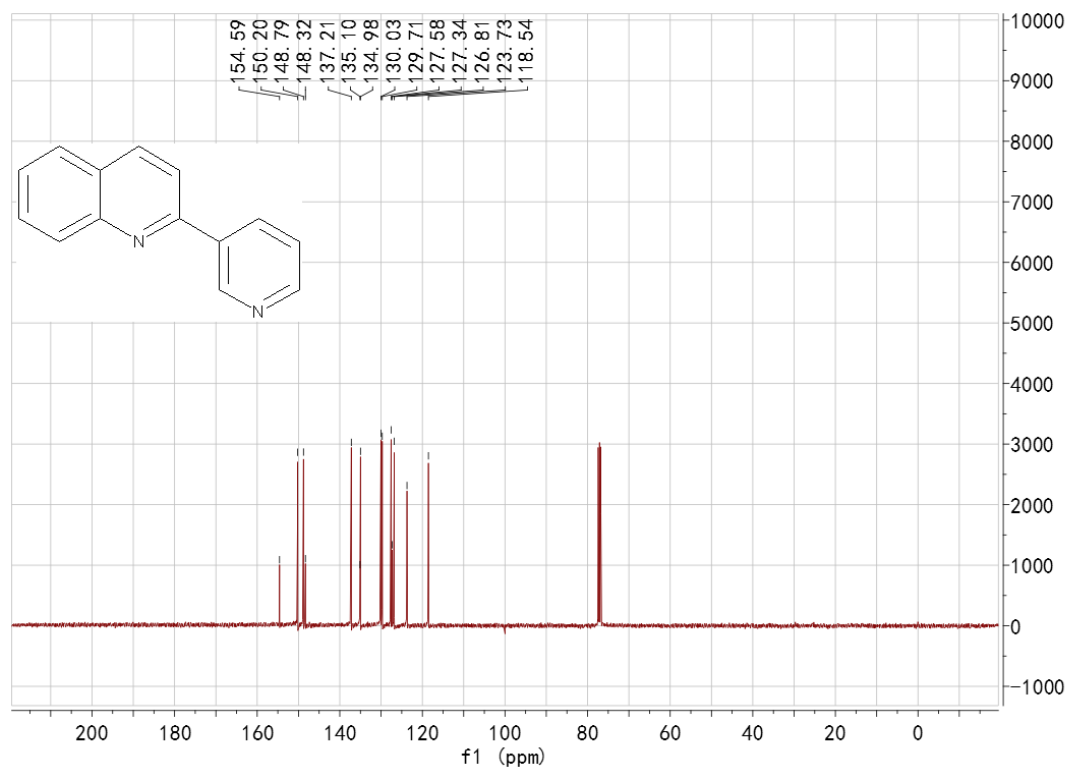

<sup>1</sup>H NMR of compound **3x**

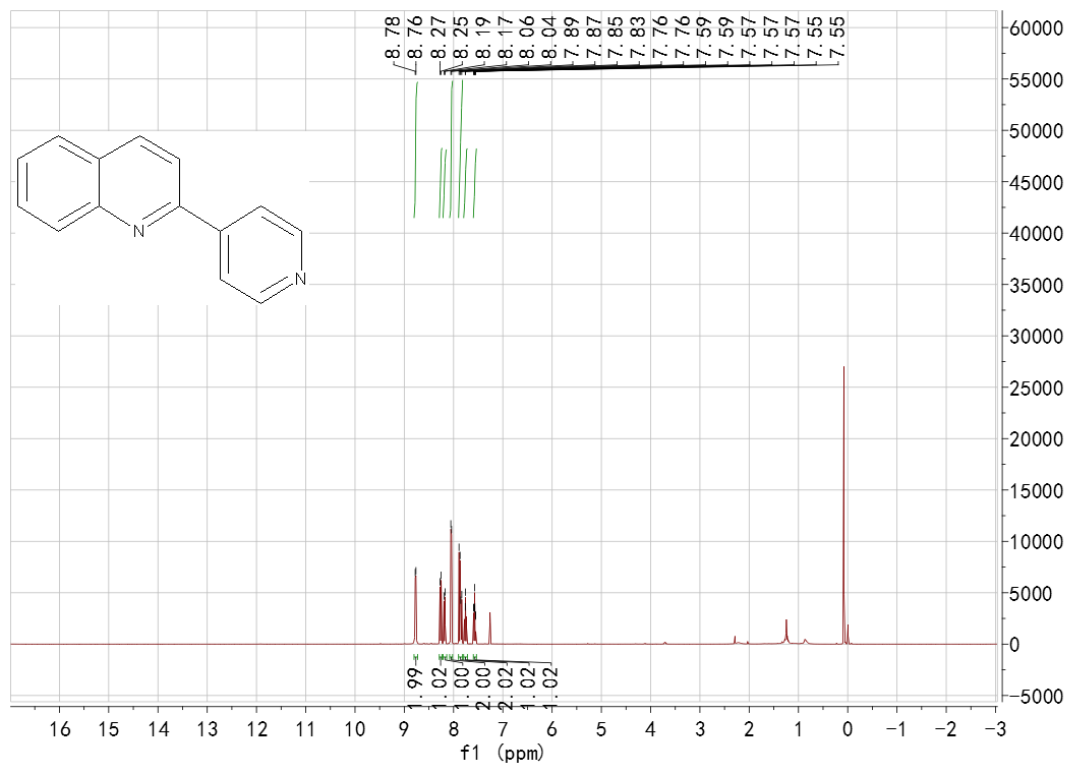

<sup>13</sup>C NMR of compound **3x**

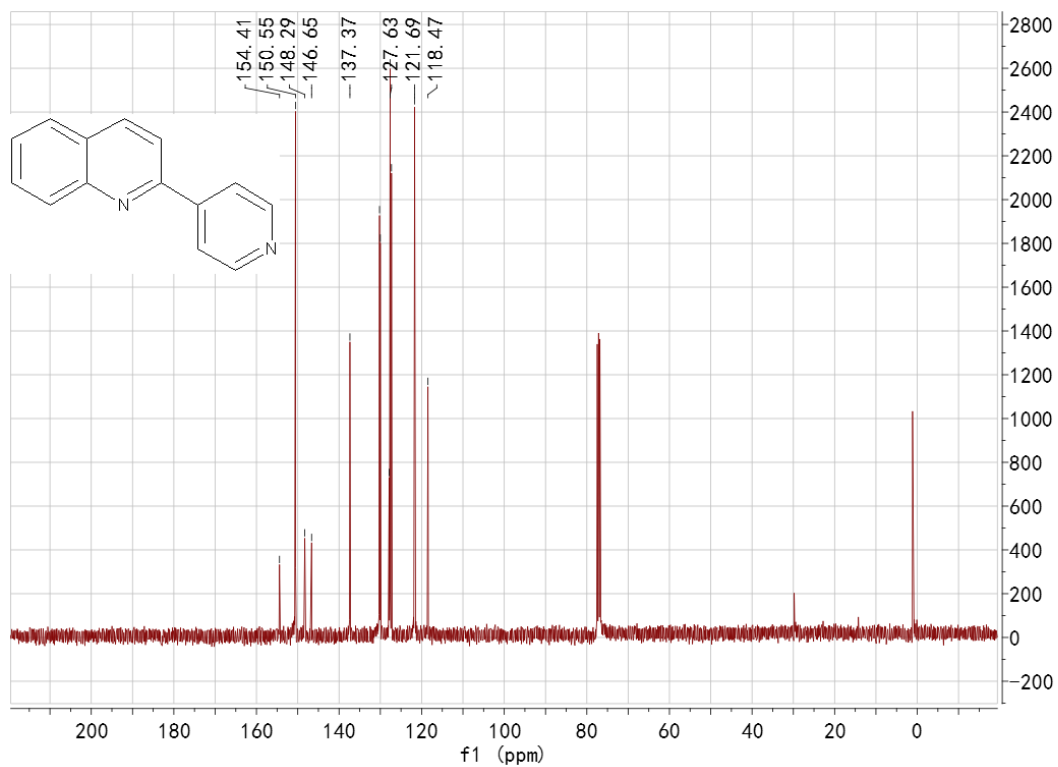



<sup>1</sup>H NMR of compound **3y**

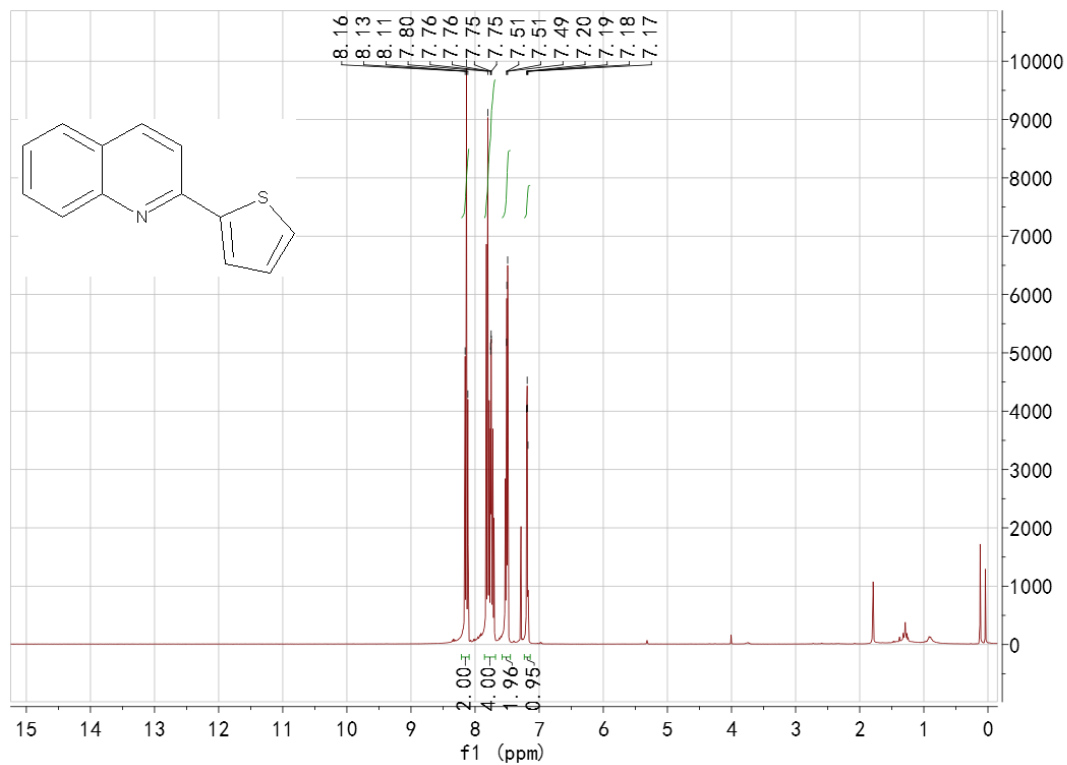

<sup>13</sup>C NMR of compound **3y**

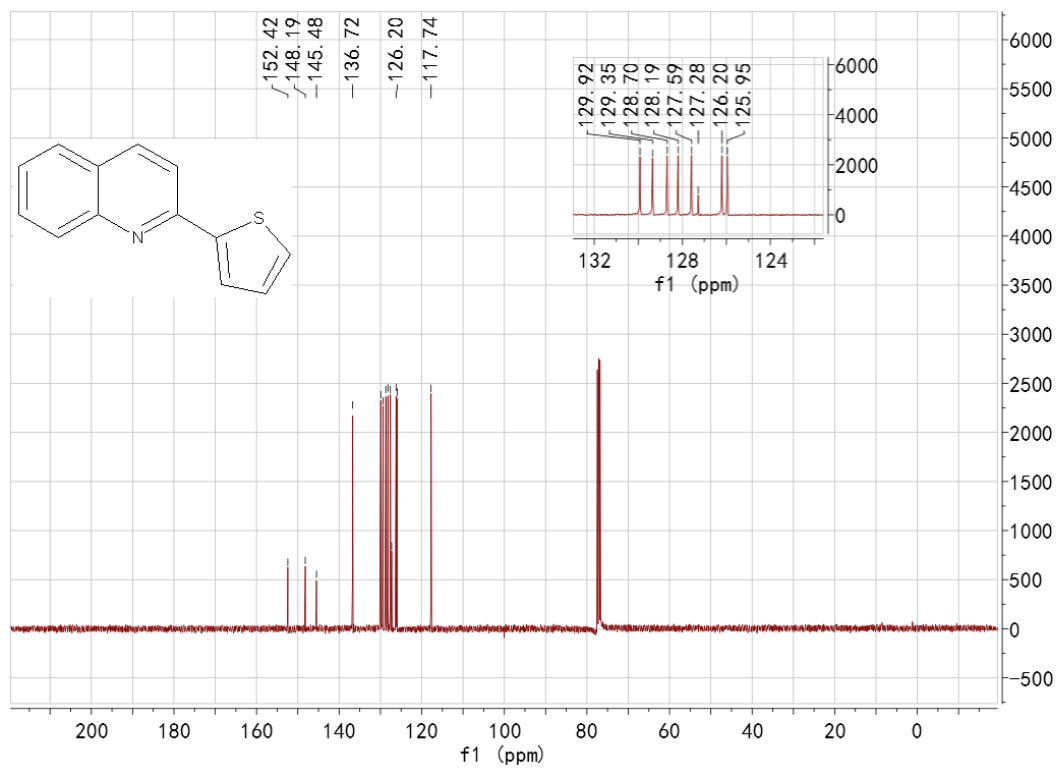

<sup>1</sup>H NMR of compound **3z**

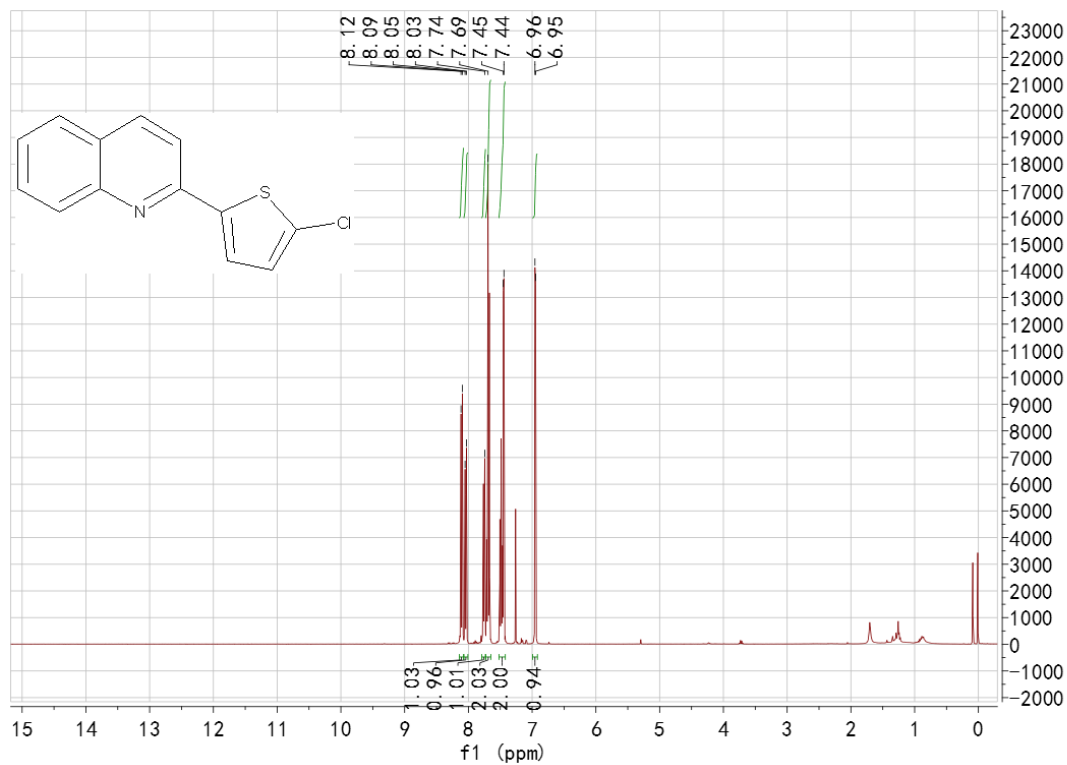

<sup>13</sup>C NMR of compound **3z**

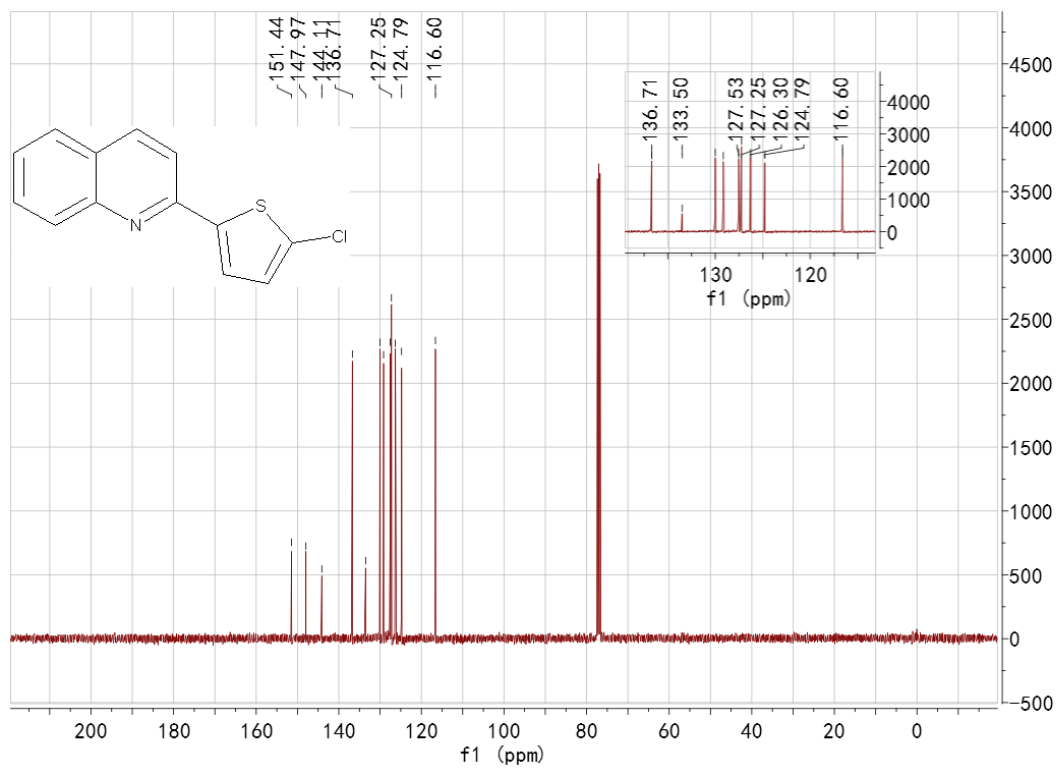

<sup>1</sup>H NMR of compound **3aa**

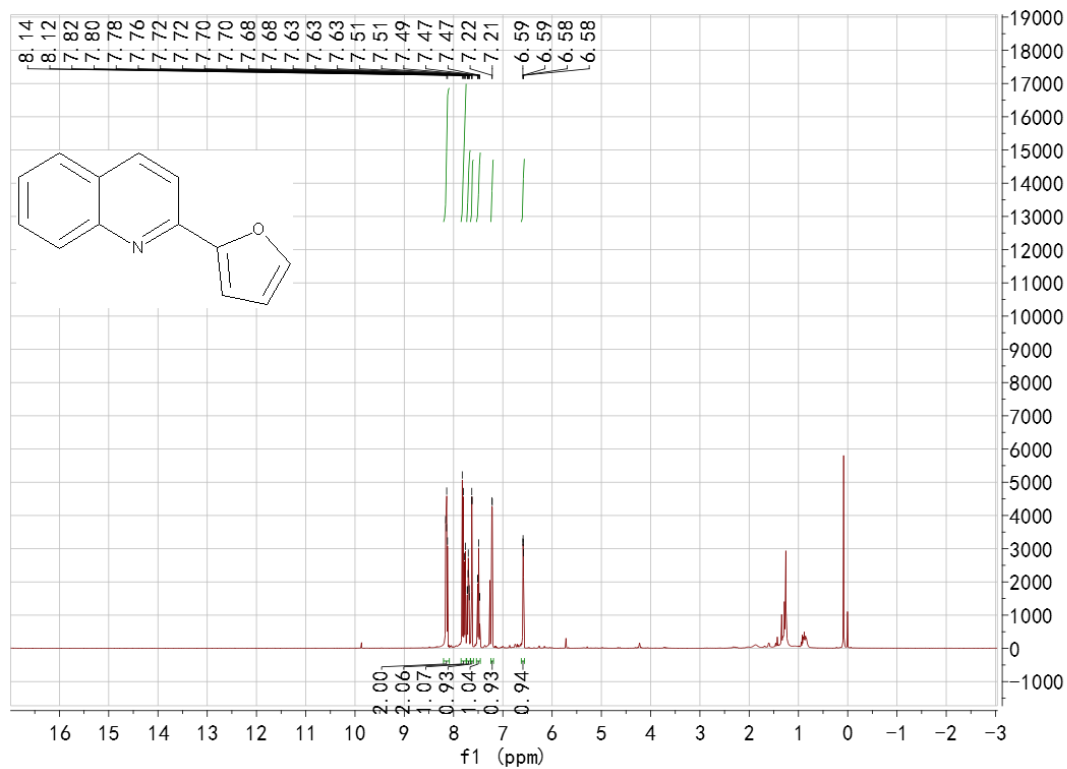

<sup>13</sup>C NMR of compound **3aa**

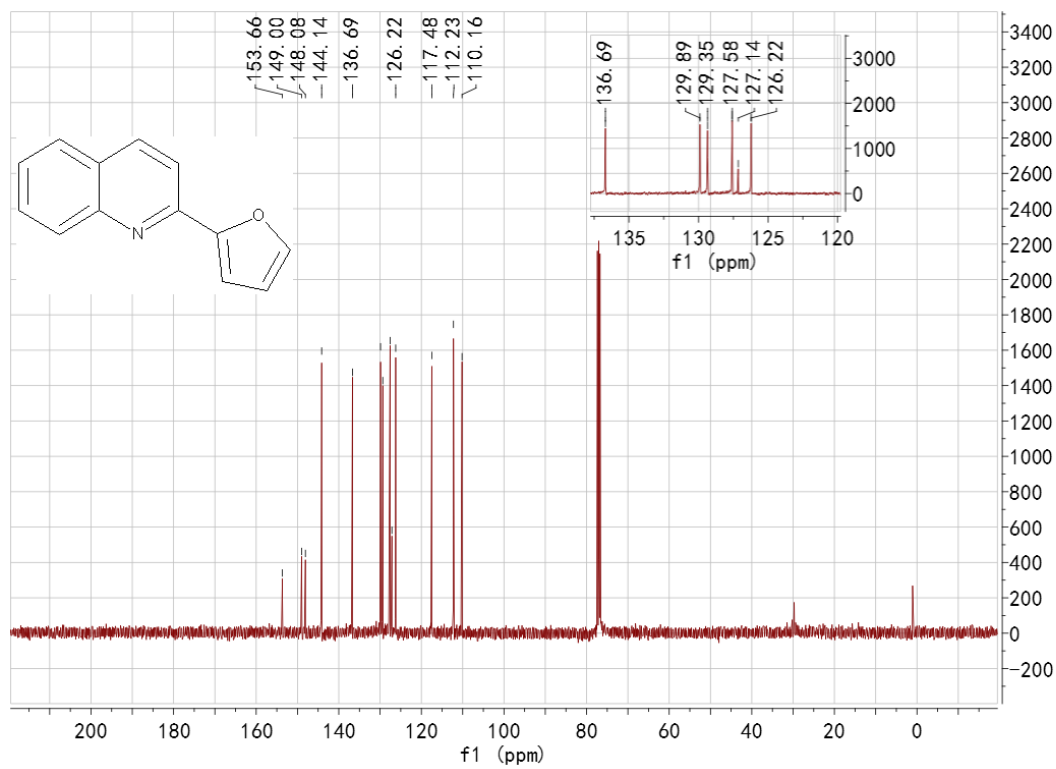

<sup>1</sup>H NMR of compound **4a**

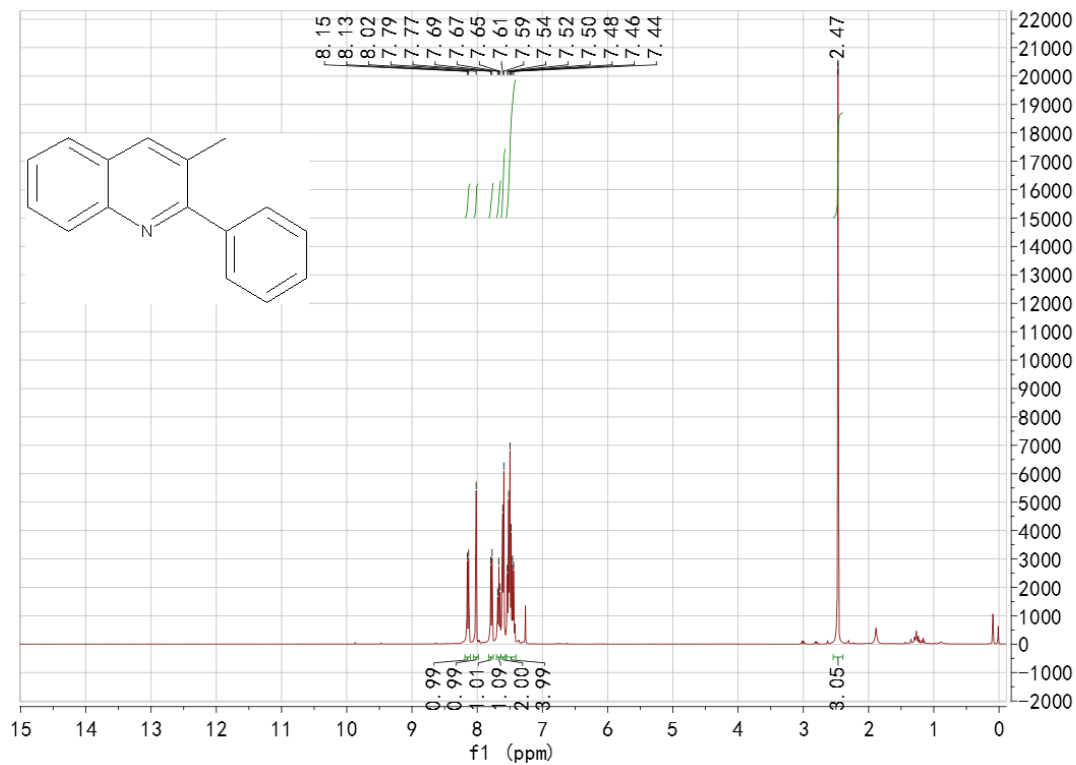

<sup>13</sup>C NMR of compound **4a**

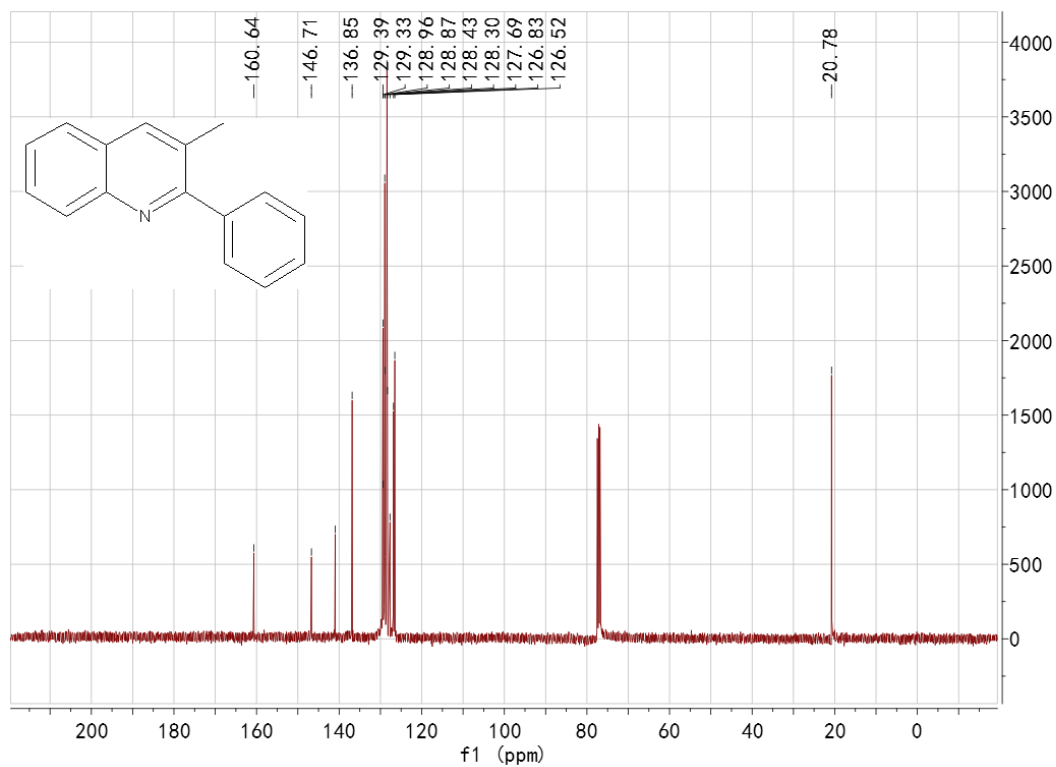

<sup>1</sup>H NMR of compound **4b**

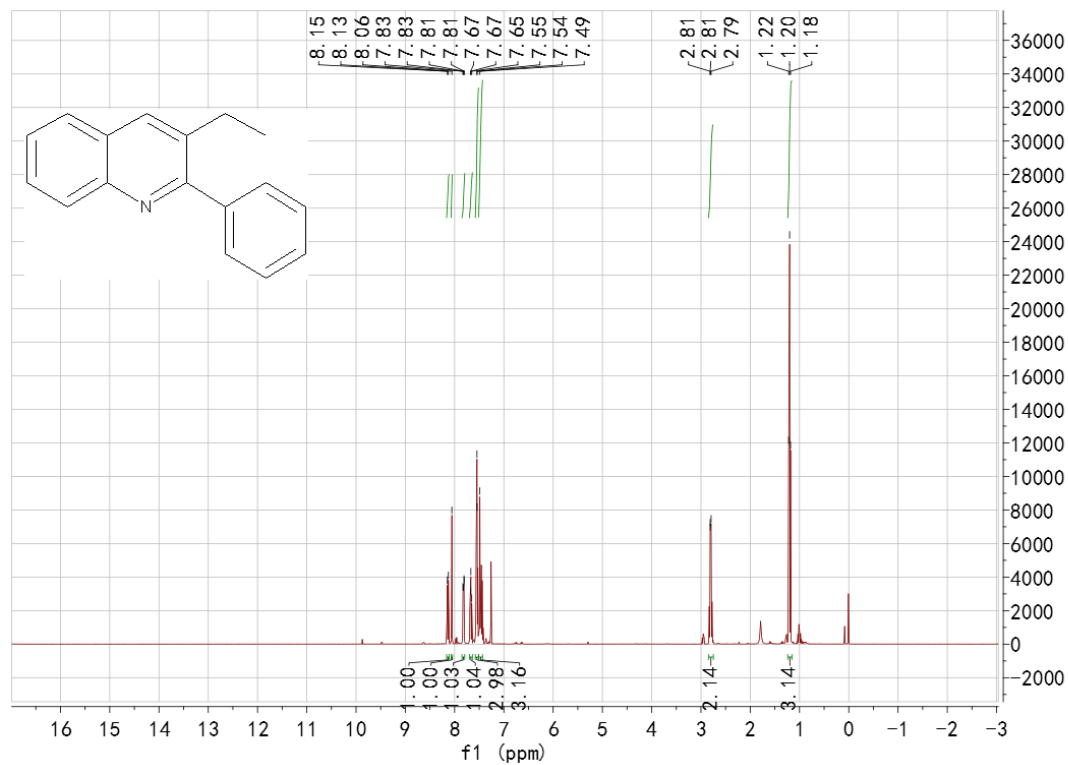

<sup>13</sup>C NMR of compound **4b**

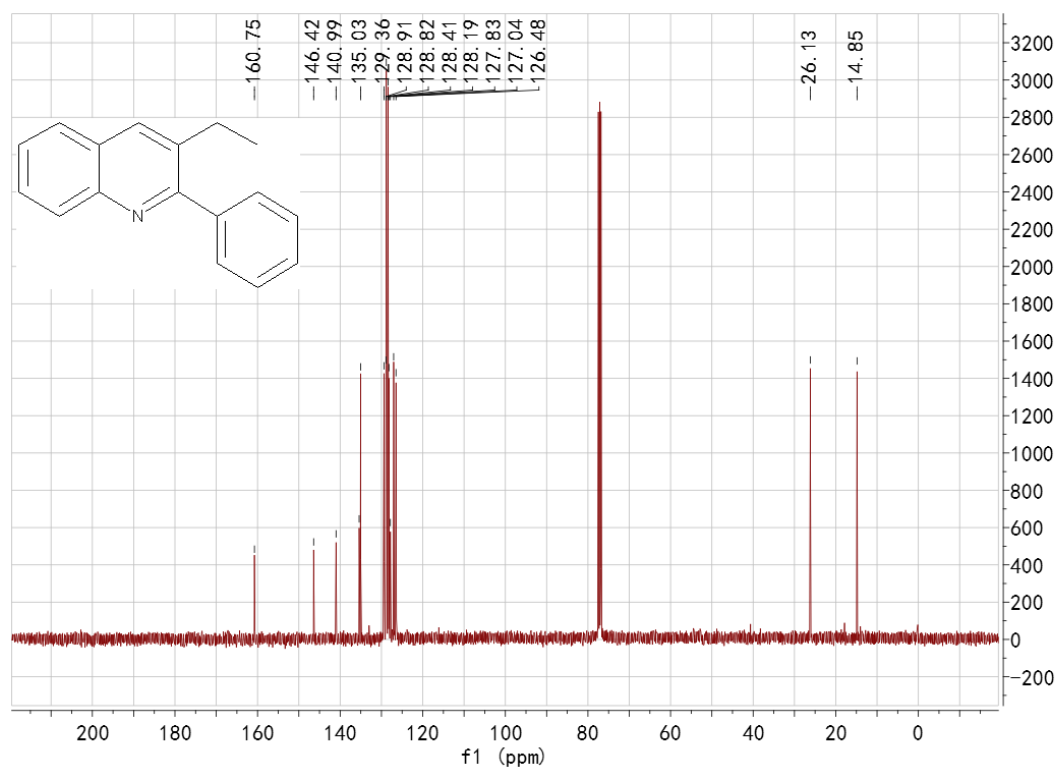

<sup>1</sup>H NMR of compound **4c**

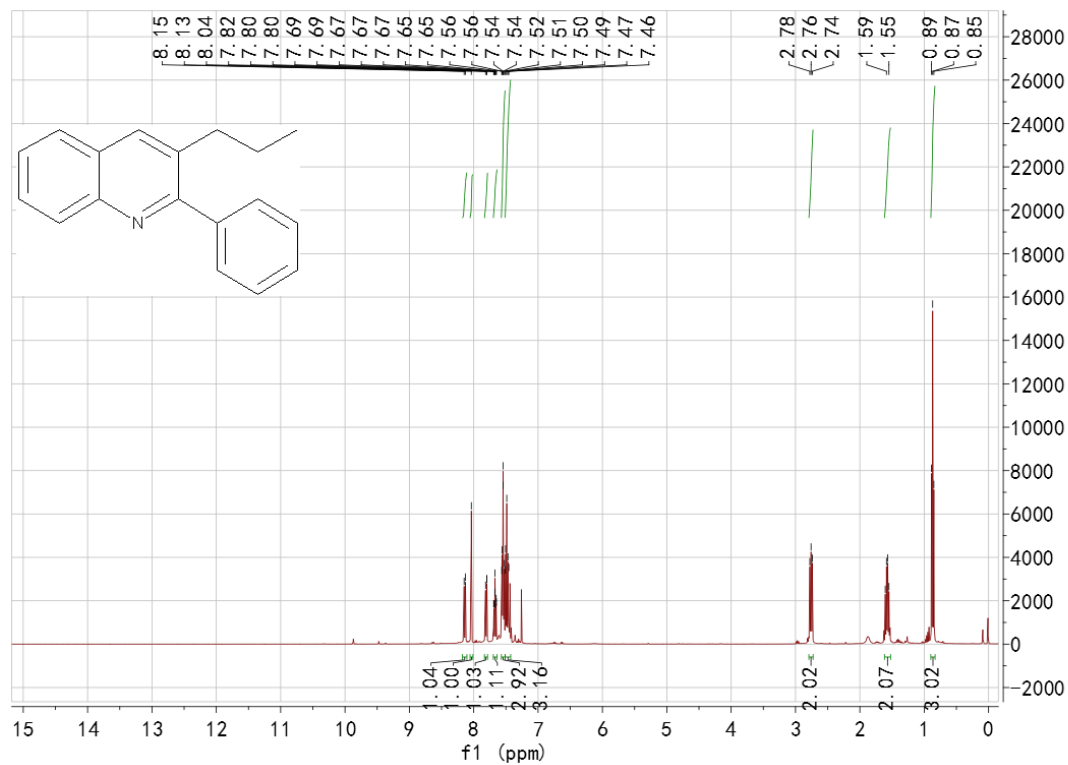

<sup>13</sup>C NMR of compound **4c**

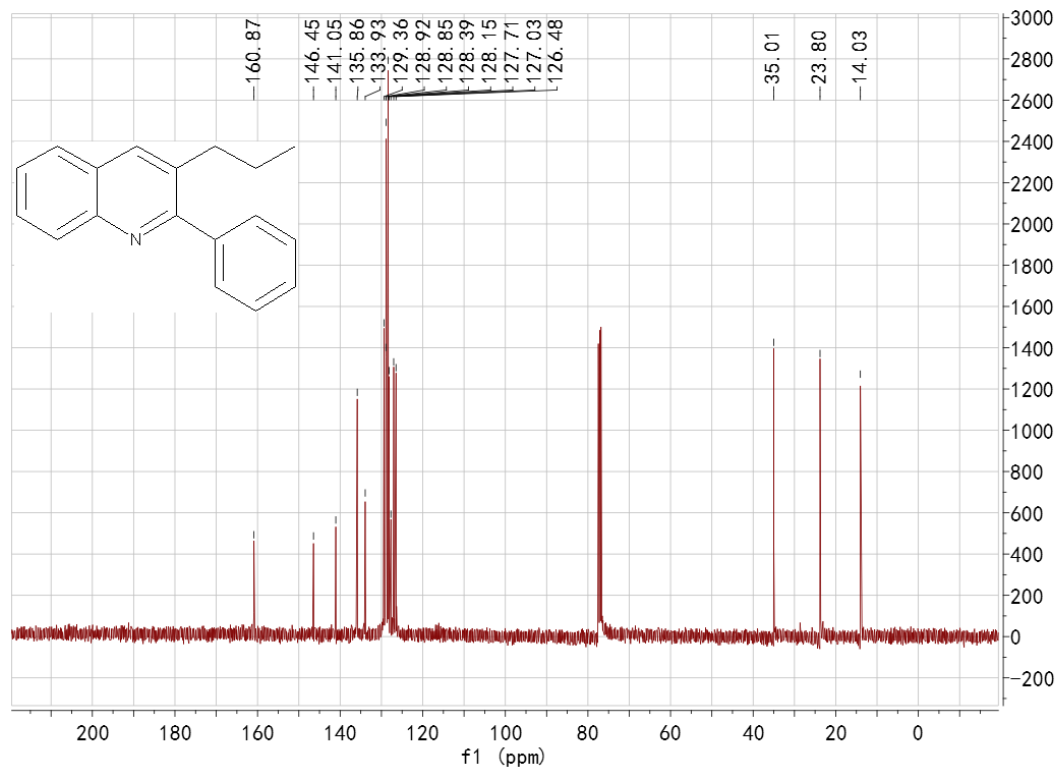

<sup>1</sup>H NMR of compound **4d**

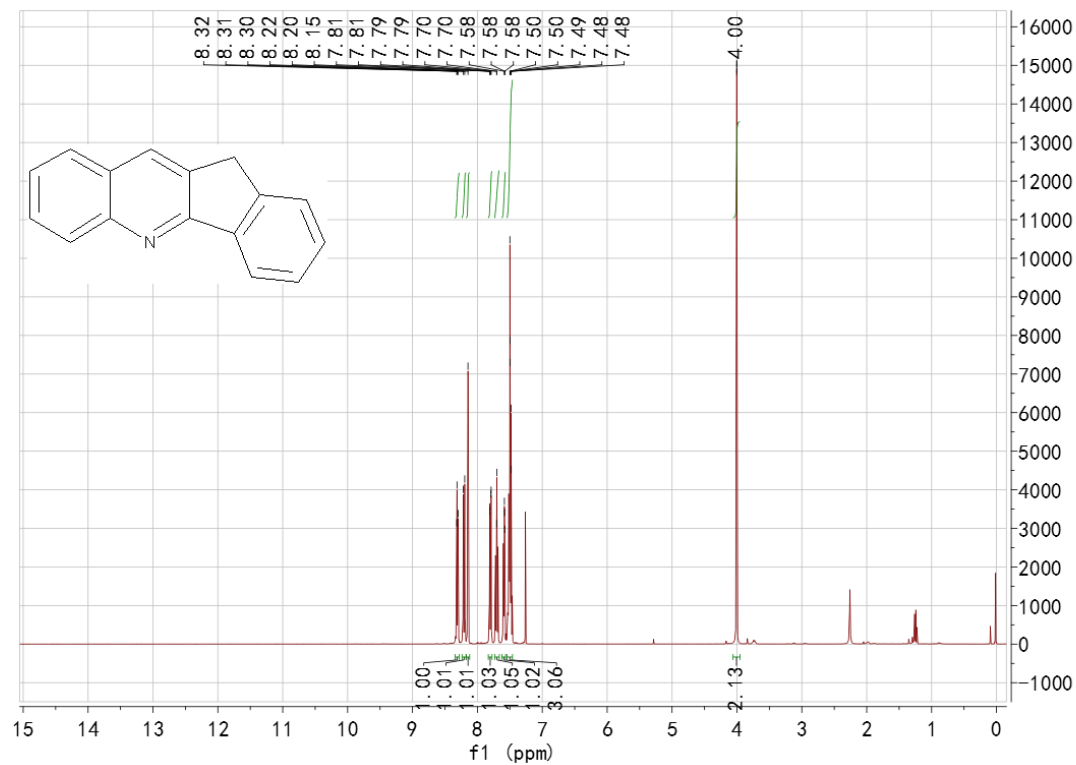

<sup>13</sup>C NMR of compound **4d**

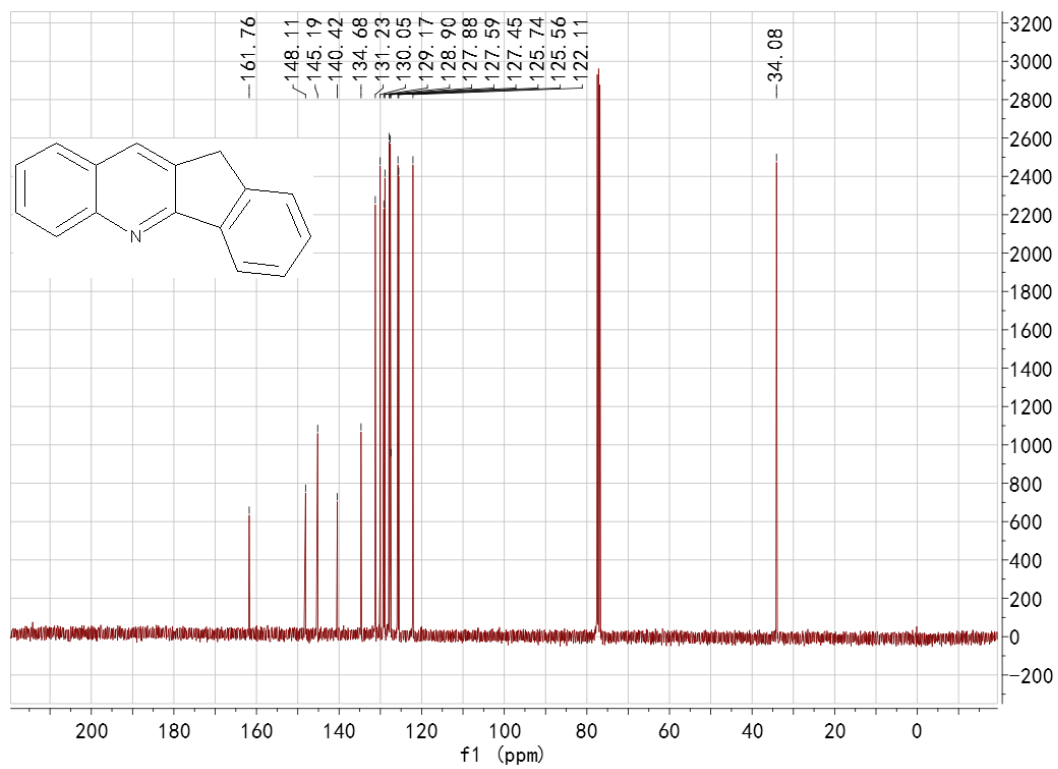

<sup>1</sup>H NMR of compound **4e**

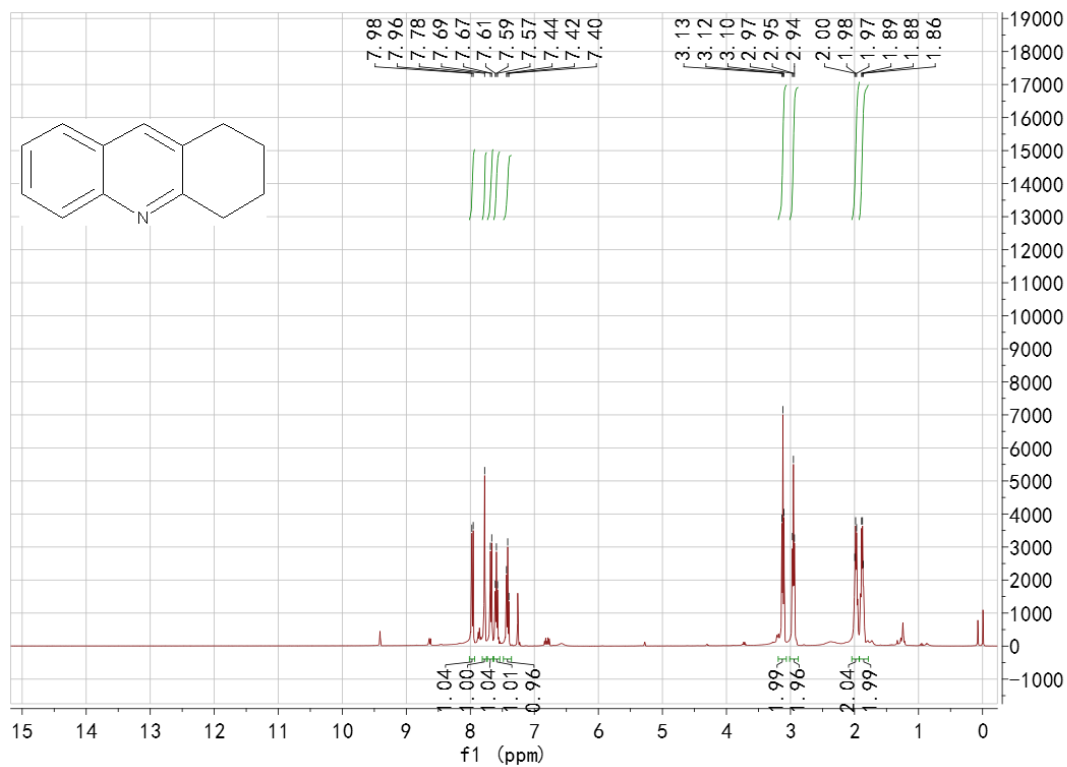

<sup>13</sup>C NMR of compound **4e**

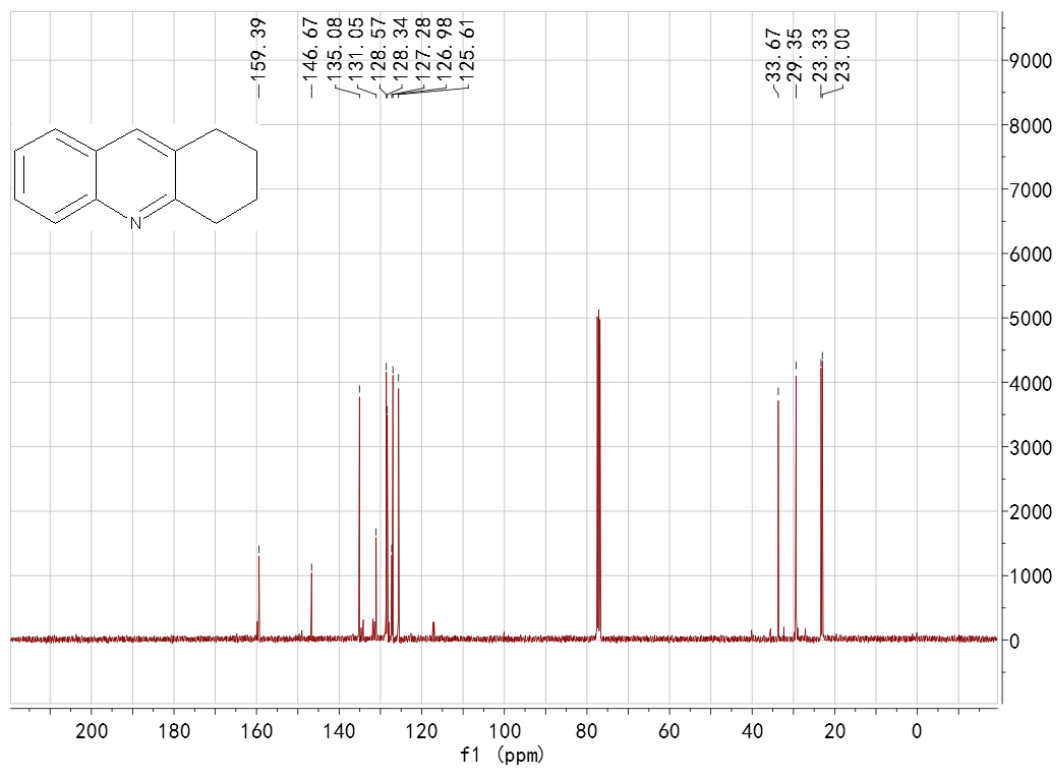



<sup>1</sup>H NMR of compound **4f**

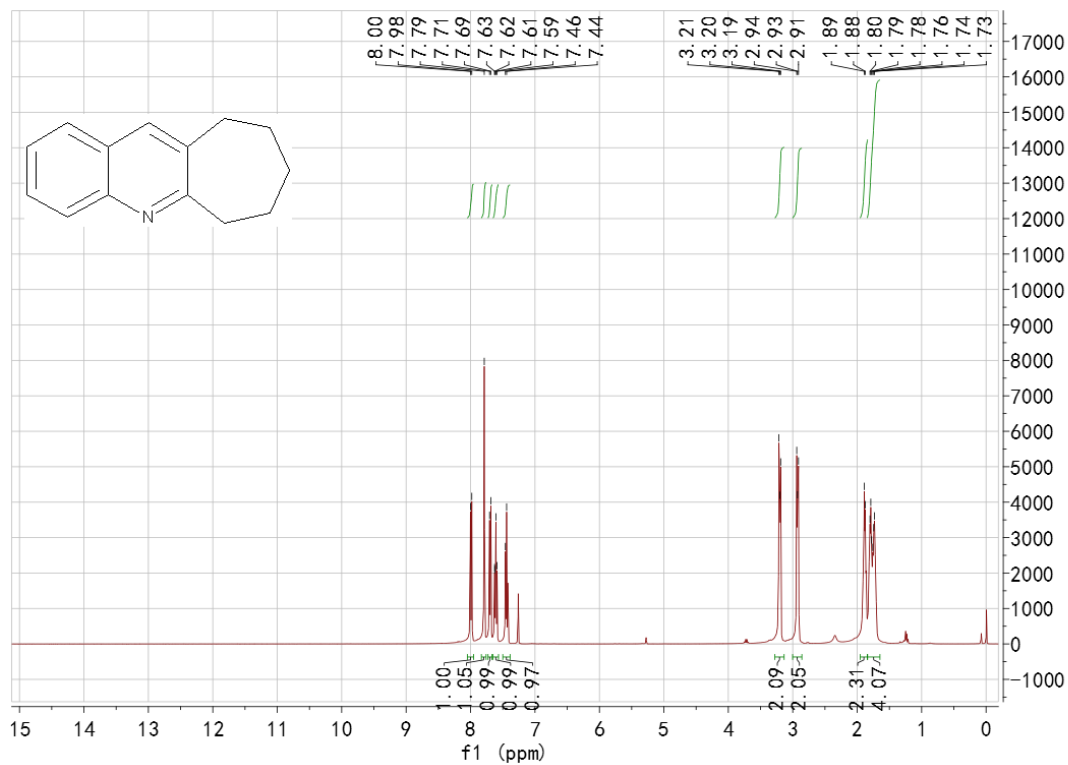

<sup>13</sup>C NMR of compound **4f**

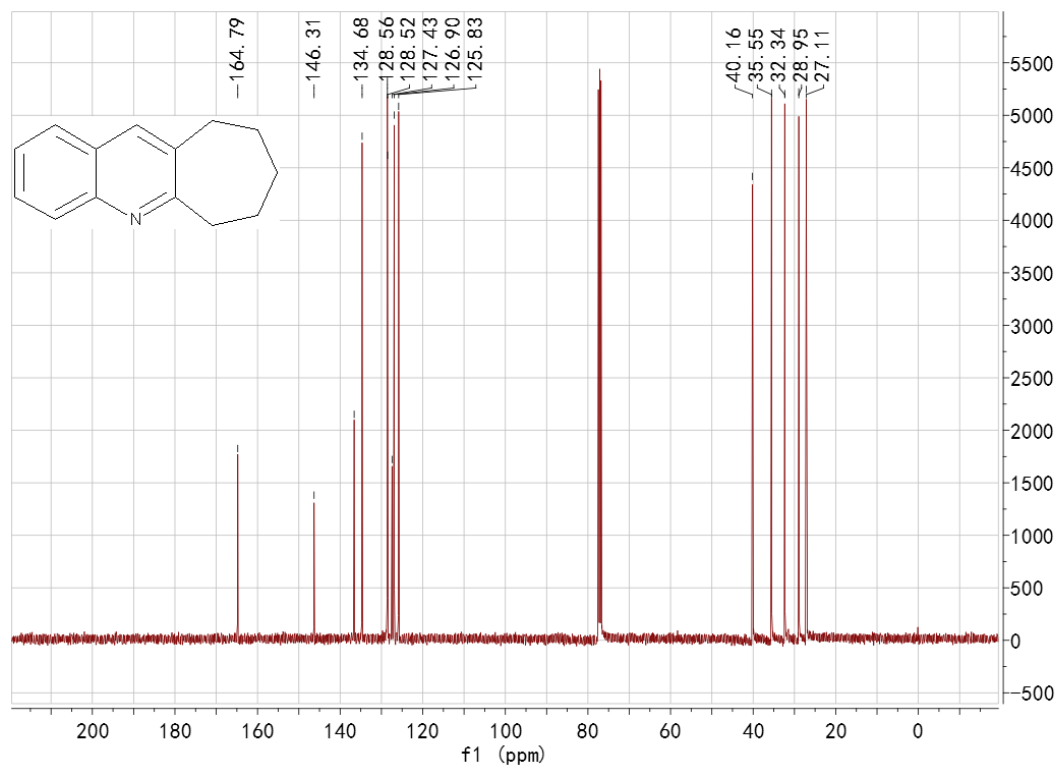

<sup>1</sup>H NMR of compound **4g**

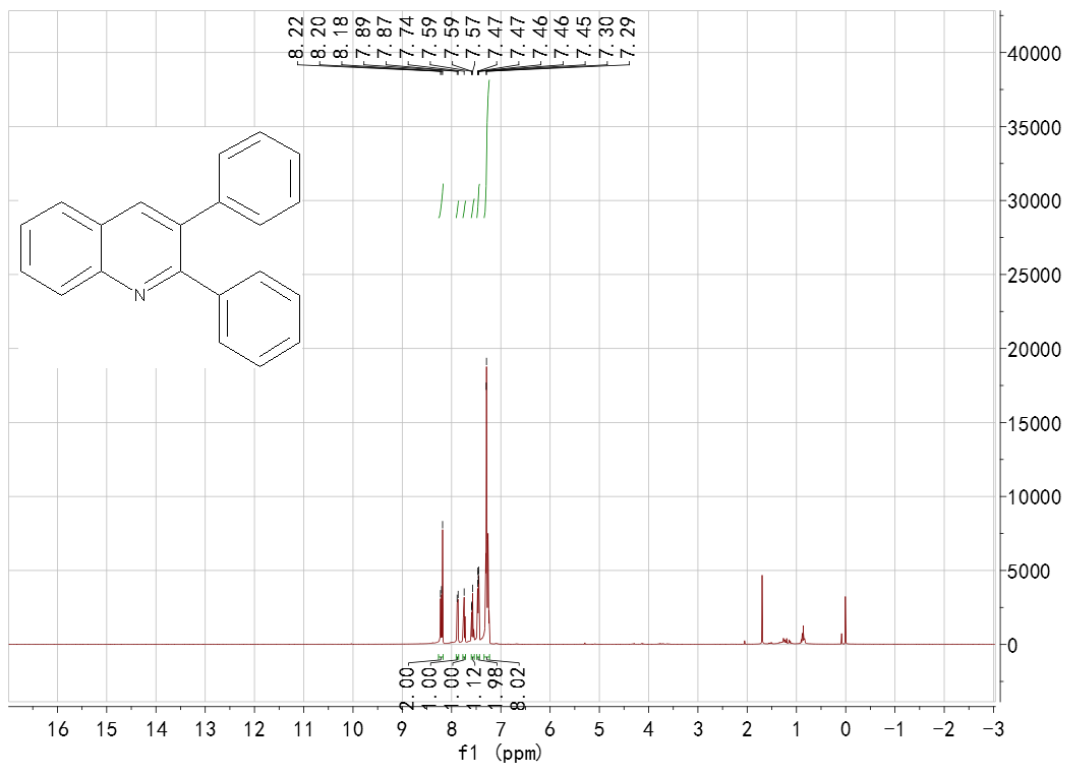

<sup>13</sup>C NMR of compound **4g**

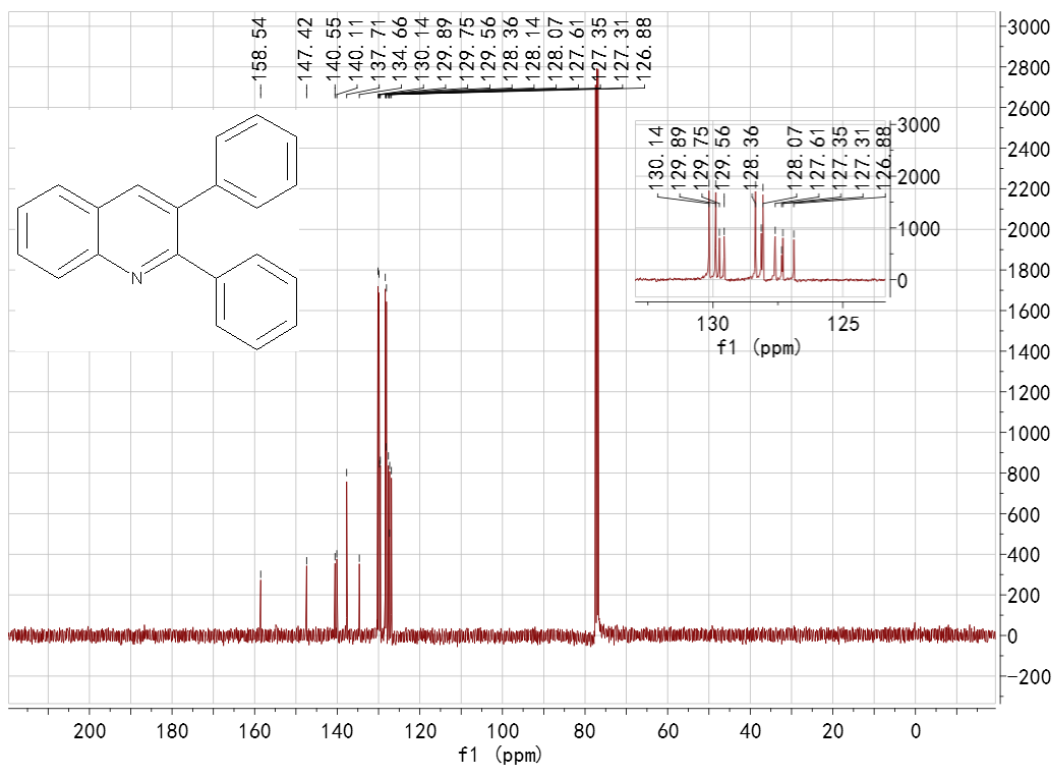

<sup>1</sup>H NMR of compound **4h**

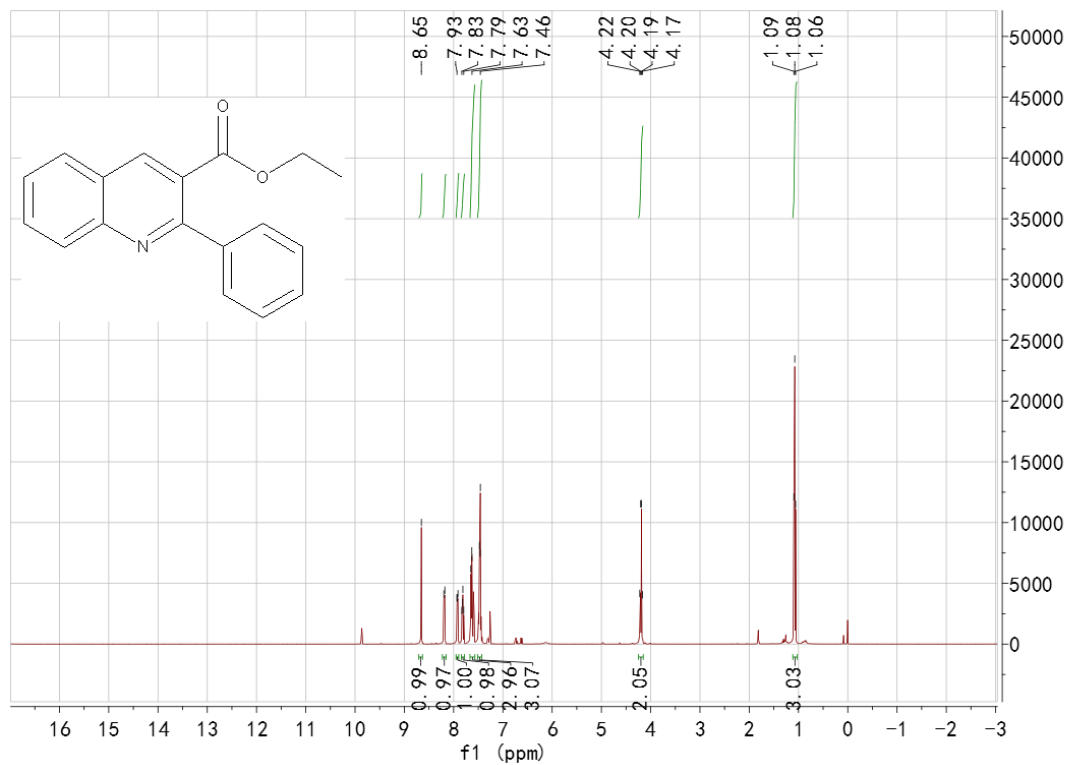

<sup>13</sup>C NMR of compound **4h**

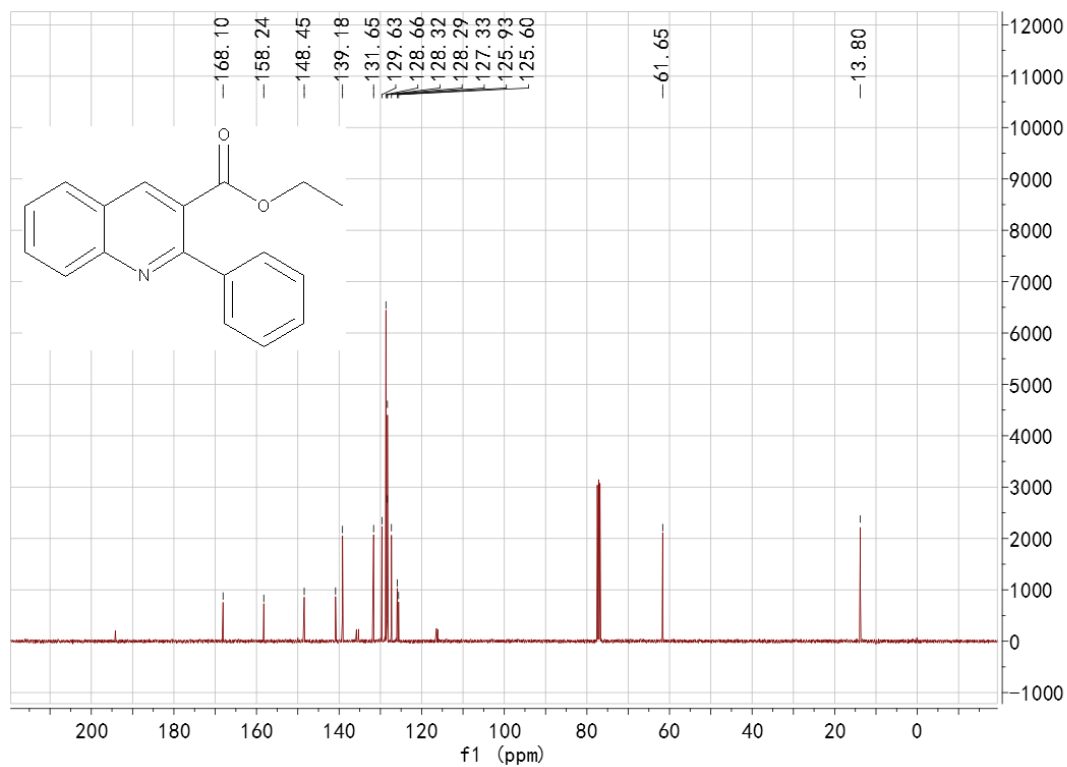

<sup>1</sup>H NMR of compound **4i**

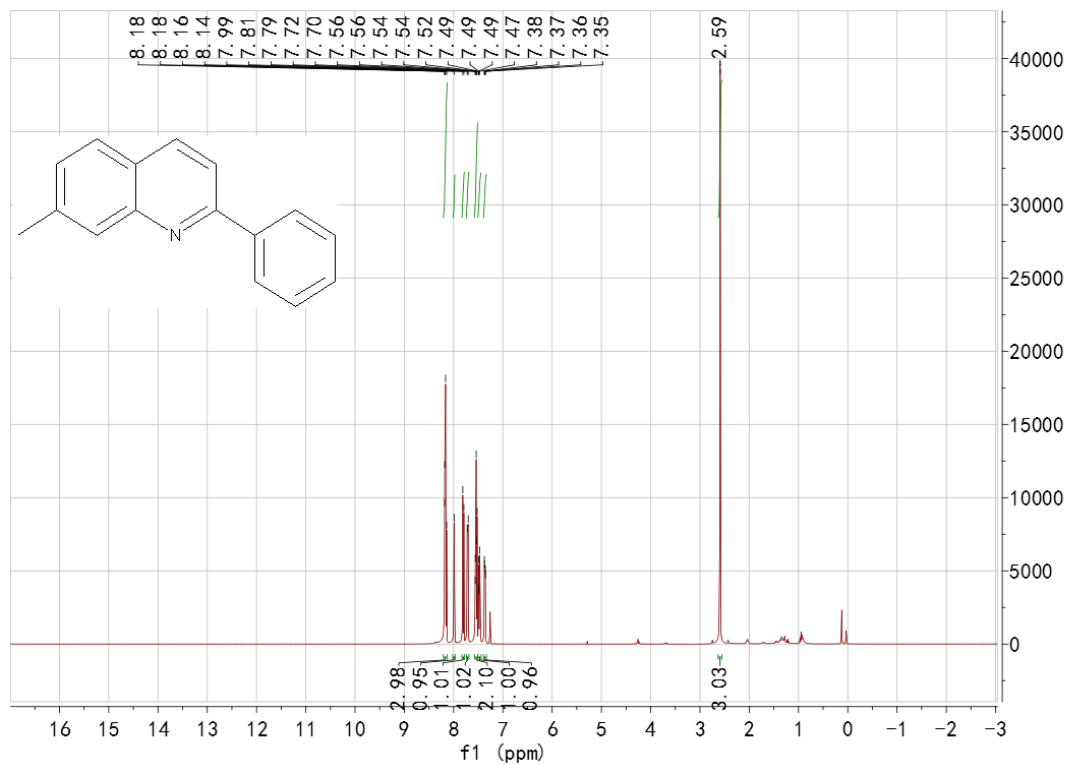

<sup>13</sup>C NMR of compound **4i**

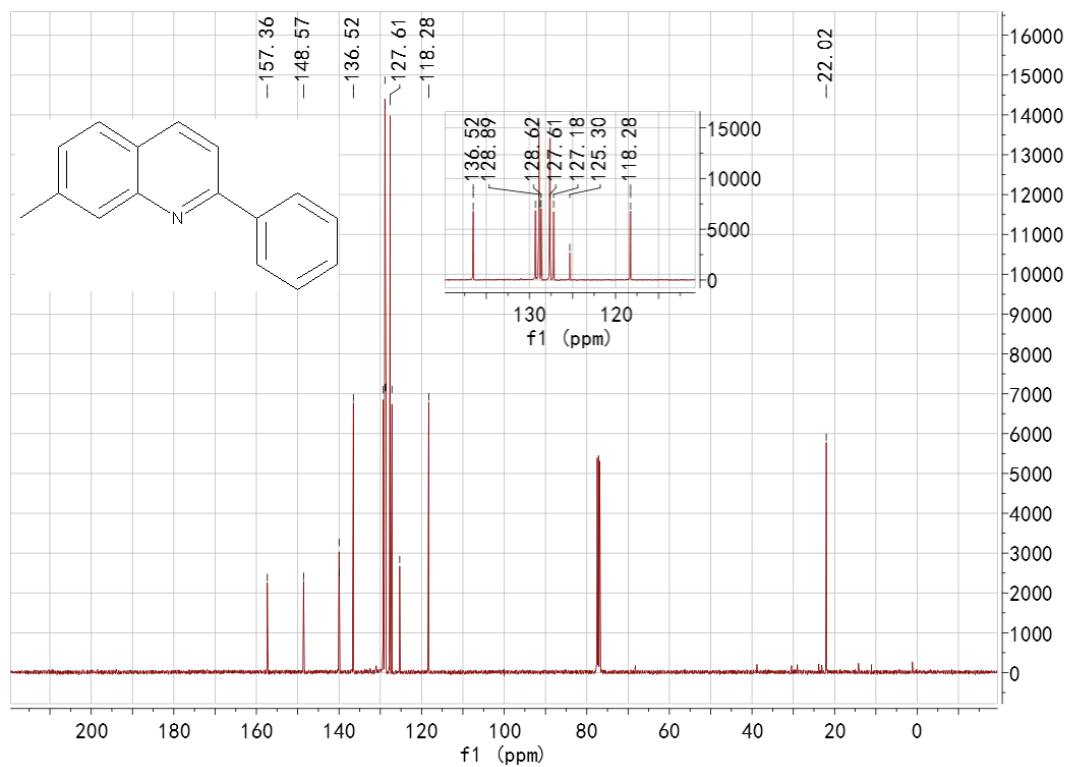

<sup>1</sup>H NMR of compound 4j

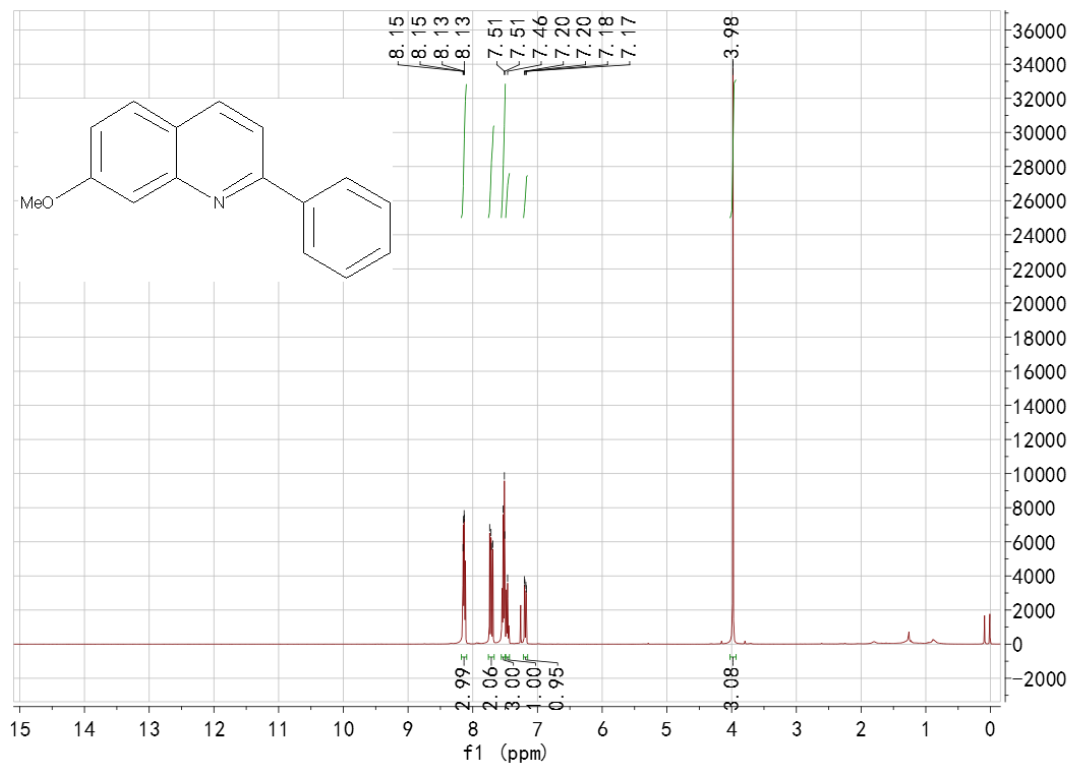

<sup>13</sup>C NMR of compound 4j

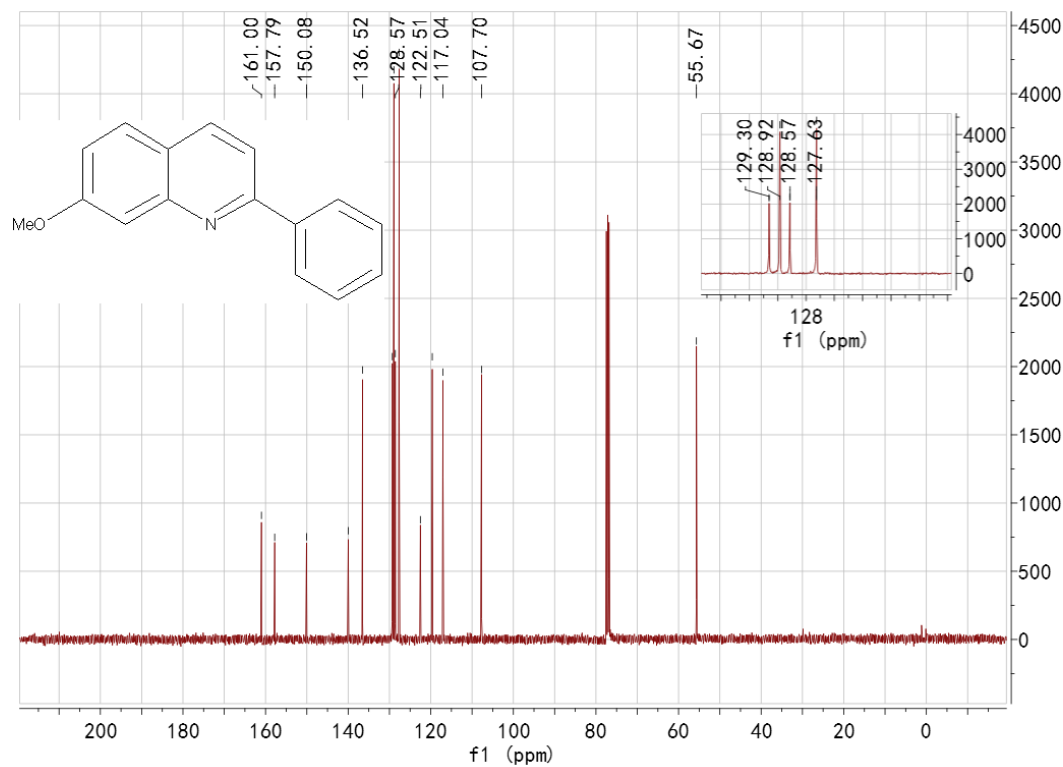

<sup>1</sup>H NMR of compound **4k**

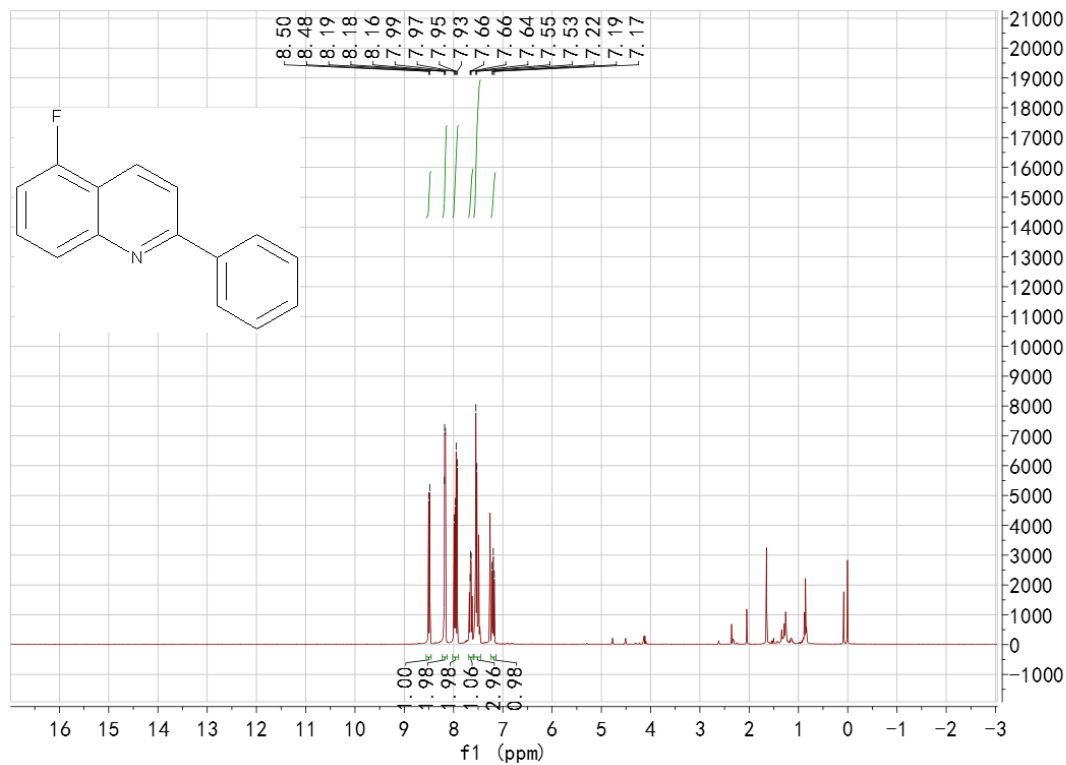

<sup>13</sup>C NMR of compound **4k**

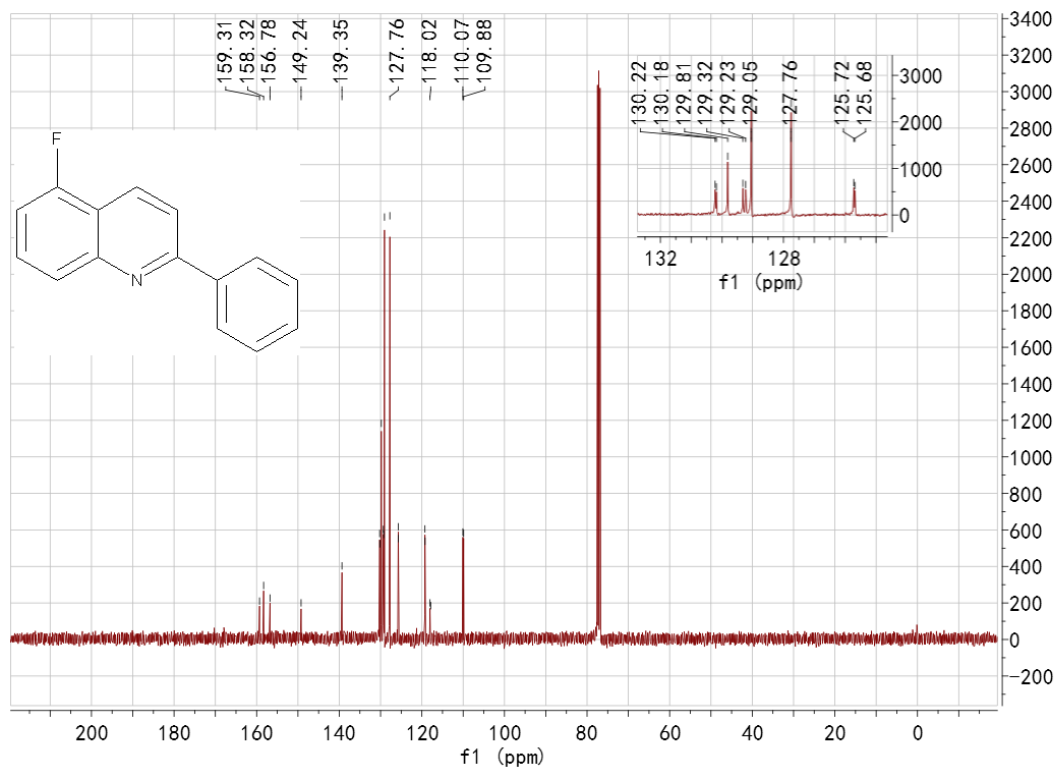

<sup>1</sup>H NMR of compound **4I**

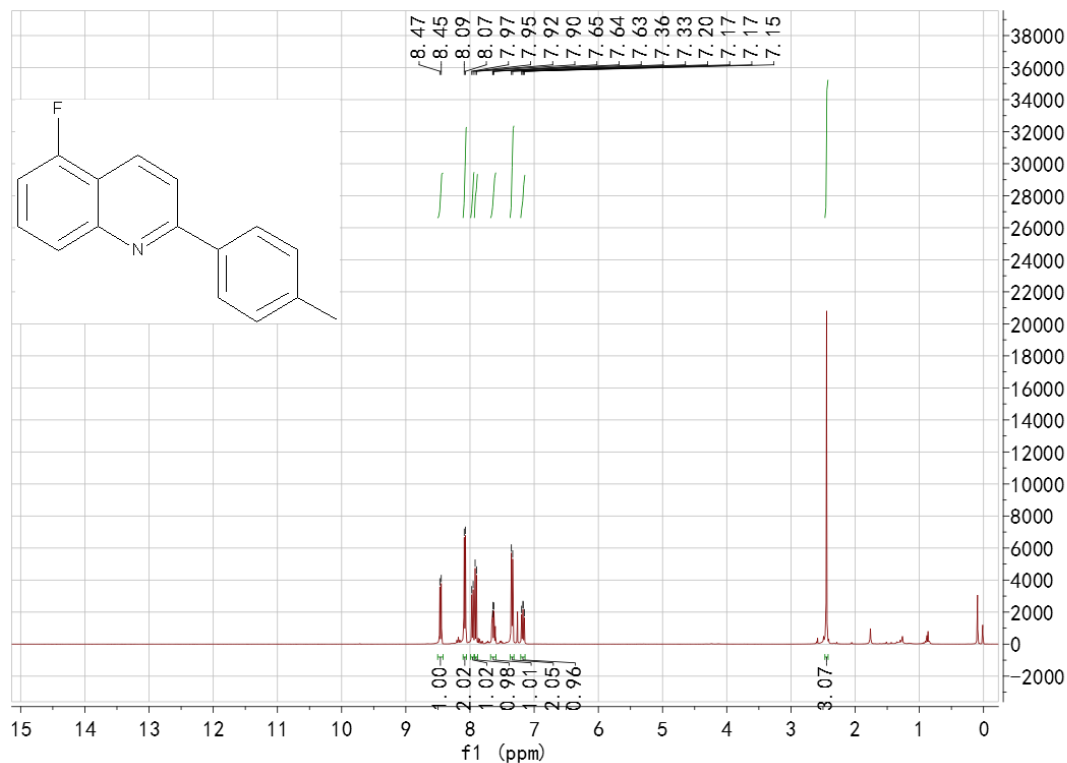

<sup>13</sup>C NMR of compound **4I**

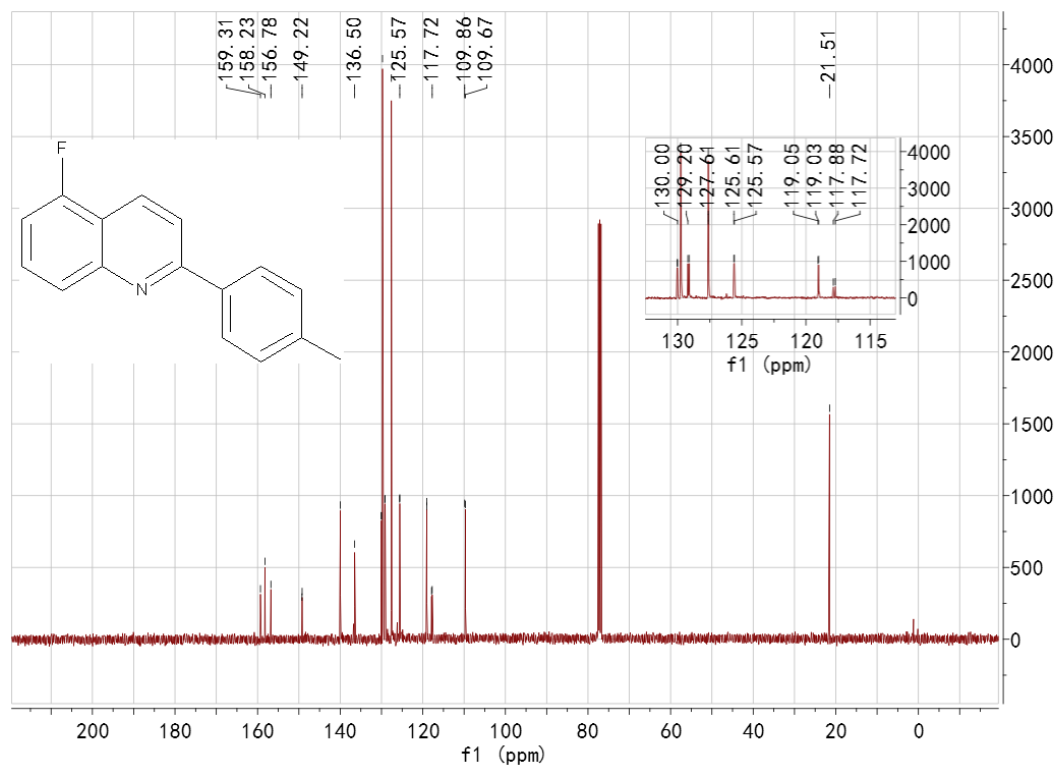

<sup>1</sup>H NMR of compound **4m**

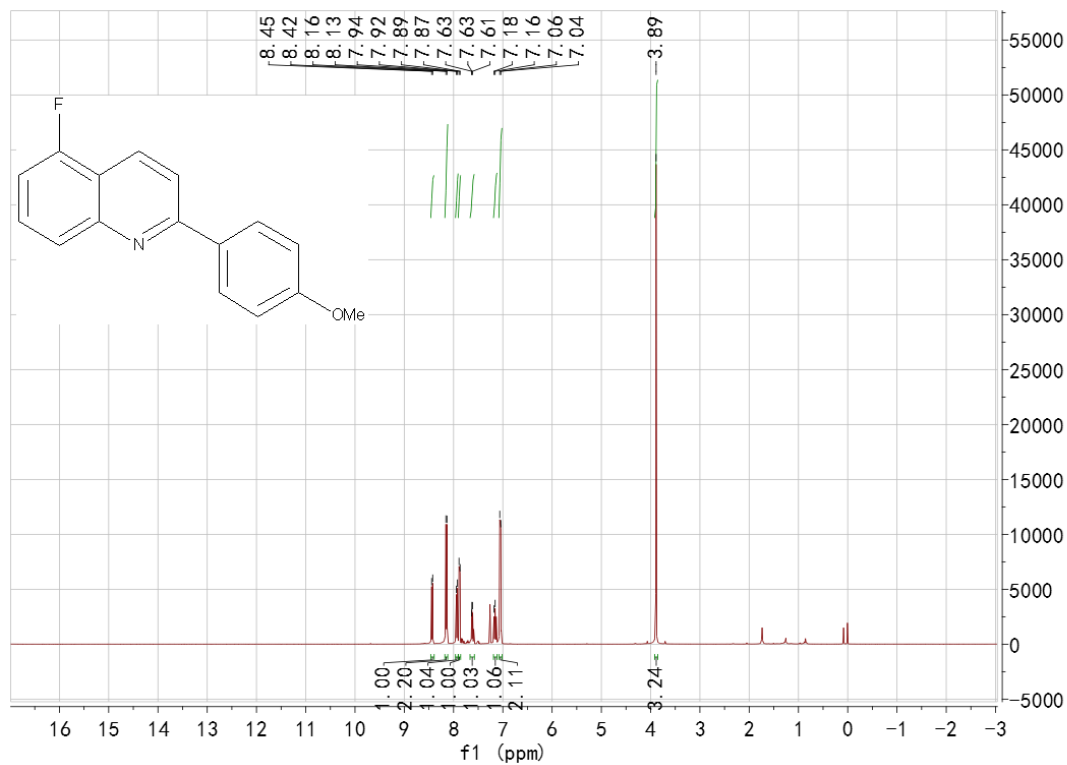

<sup>13</sup>C NMR of compound **4m**

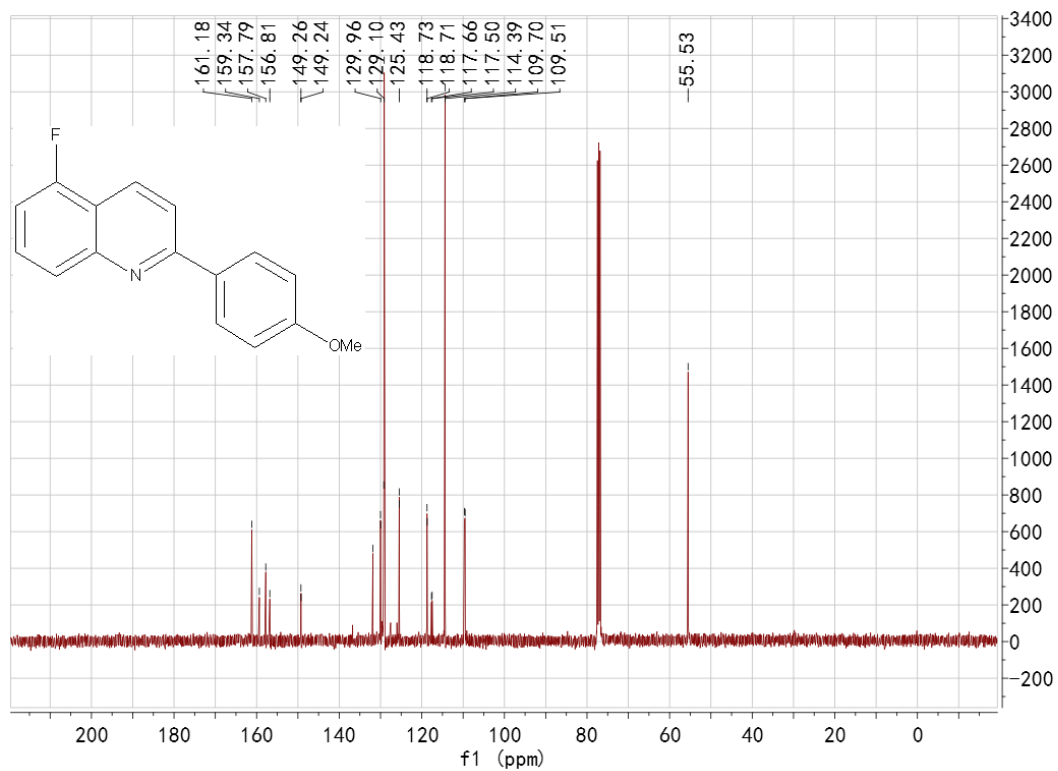

Supplement: c5ob00075k1.pdf [file c5ob00075k1.pdf]
